# Supplementary material for: Carbon disulfide binding at dinuclear and mononuclear nickel complexes ligated by a redox-active ligand: iminopyridine serving as an accumulator of redox equivalents for the activation of heteroallenes
Source: Royal Society of Chemistry journal article supplement (doi:10.1039/c2cc34307j), 2012-01-01
Supplement: c2cc34307j.pdf [file c2cc34307j.pdf]

*Supporting Information for:*

**Carbon disulfide binding at dinuclear and mononuclear nickel complexes ligated by a redox-active ligand: Iminopyridine serving as an accumulator of redox equivalents for the activation of heteroallenes**

**Amarnath Bhemaraju, Jeffrey W. Beattie, Richard L. Lord, Philip D. Martin, and Stanislav Groysman\***

Department of Chemistry, Wayne State University, Detroit, Michigan 48202, United States.

| <i>Index</i>                                                      | <i>Page</i> |
|-------------------------------------------------------------------|-------------|
| 1. General methods and procedures                                 | S2          |
| 2. Synthesis and characterization of compounds                    | S2-S3       |
| 3. X-ray crystallographic details                                 | S3          |
| 4. X-ray structure of <b>4</b>                                    | S4          |
| 5. $^1\text{H}$ , $^{13}\text{C}$ and $^{31}\text{P}$ NMR spectra | S5-S23      |
| 6. Mass spectrum of <b>2</b>                                      | S24-S26     |
| 7. FT-IR spectra                                                  | S27-S30     |
| 8. Computational details                                          | S31-S34     |
| 9. Electrochemistry                                               | S35-S36     |
| 10. References                                                    | S37         |

## 1. General methods and procedures

All reactions involving air-sensitive materials were executed in a nitrogen-filled glovebox. p-Xylylenediamine, benzylamine, 2-carboxaldehydepyridine, bis(cyclooctadiene)nickel(0) ( $\text{Ni}(\text{COD})_2$ ), carbon disulfide, and  $^{13}\text{C}$ -labeled carbon disulfide were purchased from Aldrich, Strem or TCI America and used as received. All solvents were purchased from Fisher scientific and were of HPLC grade. The solvents were purified using an MBRAUN solvent purification system and stored over 3-Å molecular sieves. Compounds were routinely characterized by  $^1\text{H}$  and  $^{13}\text{C}$  {H} NMR ( $^{13}\text{C}$  NMR thereafter), X-ray crystallography, and elemental analyses. Selected compounds were characterized by mass spectrometry (ESI). NMR spectra of all compounds were recorded at the Lumigen Instrument Center (Wayne State University) on a Varian Mercury 400 NMR Spectrometer in  $\text{C}_6\text{D}_6$  or  $(\text{CD}_3)_2\text{SO}$  at room temperature. Chemical shifts and coupling constants ( $J$ ) were reported in parts per million ( $\delta$ ) and Hertz respectively. Low resolution mass spectra were obtained at the Lumigen Instrument Center utilizing a Waters Micromass ZQ mass spectrometer (direct injection, with capillary at 3.573 (KV) and cone voltage of 20.000 (V)). Elemental analyses were performed by Midwest Microlab LLC.

## 2. Synthesis and characterization of compounds

**Preparation of  $\text{L}^1$ ,  $\text{Ni}_2(\text{L}^1)(\text{COD})_2$  (1),  $\text{Ni}_2\text{L}^1(\text{CS}_2)_2$  (2),  $\text{Ni}(\text{L}^2)(\text{COD})$  (3), and  $\text{Ni}(\text{L}^2)(\text{CS}_2)$  (4).**

The synthesis of  $\text{L}^1$  and  $\text{Ni}_2(\text{L}^1)(\text{COD})_2$  has been reported by us previously<sup>11</sup>, and  $\text{L}^2$  was synthesized according to the previously published procedure.<sup>2</sup>

**$\text{Ni}(\text{L}^2)(\text{COD})$  (3).** A solution of  $\text{L}^2$  (53 mg, 0.27 mmol) in 5 mL of THF was added dropwise at room temperature to a 5 mL solution of bis(cyclooctadiene)nickel(0) ( $\text{Ni}(\text{COD})_2$ ) (103 mg, 0.374 mmol) in THF. The resulting violet-blue colored reaction mixture was stirred for 1 h, and the solvent was removed in *vacuo*. Crystallization from hexanes resulted in violet-blue crystalline solid (70 mg, 71 %).  $^1\text{H}$  NMR ( $\text{C}_6\text{D}_6$ , 400 MHz)  $\delta$  10.10 (d,  $J = 6.8$ , 1H), 8.23 (s, 1H), 7.31-7.27 (m, 2H), 7.23-7.18 (m, 2H), 7.17-7.10 (m, 2H), 7.07 (m, 1H), 6.92 (dt,  $J = 8.0, 1.2$ , 1H), 5.29 (s, 2H), 3.77 (m, 2H), 3.70 (m, 2H), 2.74 (m, 2H), 2.51 (m, 2H), 1.74-1.57 (m, 4H);  $^{13}\text{C}$  NMR ( $\text{C}_6\text{D}_6$ , 75 MHz)  $\delta$  152.22, 147.96, 142.60, 139.86, 128.60, 128.42, 127.63, 127.44, 127.16, 125.47, 118.98, 82.97, 82.06, 66.38, 31.36, 31.32. Anal. Calcd for  $\text{C}_{21}\text{H}_{24}\text{N}_2\text{Ni}\cdot\text{C}_4\text{H}_{10}\text{O}$ : C, 68.67; H, 7.84; N, 6.41. Found: C, 68.19; H, 6.65; N, 6.03.

**$\text{NiL}^2(\text{CS}_2)$  (4).** A 0.083 M solution of  $\text{CS}_2$  (1.38 mL, 0.115 mmol) in THF, was added to the 3 mL of violet-blue  $\text{Ni}(\text{L}^2)(\text{COD})$  (60 mg, 0.165 mmol) solution in diethyl ether. A precipitate was obtained after the addition of the  $\text{CS}_2$  solution. An additional 4 mL of diethyl ether was added to the reaction mixture and it was stirred for 10 minutes. Crystallization of the insoluble precipitate using  $\text{CH}_3\text{CN}$  and ether resulted in a crystalline purple-brown solid (32 mg, 84 %).  $^1\text{H}$  NMR ( $\text{DMSO}-d_6$ , 400 MHz)  $\delta$  9.47 (d,  $J = 4.8$ , 1H), 8.93 (s, 1H), 8.22 (t,  $J = 7.6$ , 1H), 7.98 (d,  $J = 7.6$ , 1H), 7.91 (t,  $J = 6.4$ , 1H), 7.48 (d,  $J = 7.2$ , 2H), 7.41-7.27 (m, 3H), 5.23 (m, 2H);  $^{13}\text{C}$  NMR ( $\text{DMSO}-d_6$ , 75 MHz)  $\delta$  267.90 ( $^{13}\text{CS}_2$ ), 165.75, 152.50, 148.36, 138.63, 136.36, 130.76, 128.48, 128.33, 128.12, 128.05, 127.27, 126.33, 62.10. MS (ESI) calcd for  $[\text{Ni}(\text{L}^2)]^+$  254.03, found 253.11. We were not able to observe the parent ion in the mass spectrum. The compound is unstable, decomposing over time as demonstrated below. The attempted EA shows low carbon

percentage. Anal. Calcd for  $C_{14}H_{12}N_2NiS_2$ : C, 50.79; H, 3.65; N, 8.46. Found: C, 46.34; H, 3.52; N, 7.24.

**Reaction of  $Ni_2L^1(^{13}CS_2)_2$  with unlabelled  $CS_2$ .** A solution of 5 mg of  $Ni_2L^1(^{13}CS_2)$  in  $DMSO-d_6$  was treated with ca. 3 equiv of  $CS_2$ .  $^{13}C$  NMR spectrum (600 scans, Figure S12) was collected has demonstrated no signals attributable to  $^{13}CS_2$ . The solution was left overnight at RT, and another  $^{13}C$  NMR spectrum (600 scans, Figure S13) was collected. The peak at 193 ppm (free  $^{13}CS_2$ ) was observed.

**Reaction of  $Ni_2L^1(^{13}CS_2)_2$  with  $[FeCp_2](PF_6)$ .** A deep-purple solution of 22 mg of  $Ni_2L^1(^{13}CS_2)$  in 2 mL of  $DMSO-d_6$  was treated with 2 equiv (25 mg) of  $[FeCp_2](PF_6)$ . An immediate color change to yellow was observed, and was followed by a slow color change to purple.  $^1H$  NMR (Figure S14) displayed a peak at 4.16 ppm ( $FeCp_2$ ). In addition, small amount of the unreacted starting material ( $Ni_2L^1(^{13}CS_2)_2$ ) was also observed.  $^{13}C$  NMR spectrum (1200 scans, Figure S15) has displayed a signal at 192 ppm (free  $^{13}CS_2$ ) and 67 ppm ( $FeCp_2$ ). Addition of another batch of  $[FeCp_2](PF_6)$  (18 mg) resulted in a yellow-green solution.  $^1H$  NMR of this solution contained no peaks attributed to ( $Ni_2L^1(^{13}CS_2)_2$ ); a very broad resonance (that we attribute to the mixture of  $FeCp_2/[FeCp_2](PF_6)$ ) was observed around 6.2 ppm (Figure S16).  $^{13}C$  NMR (Figure S17) demonstrated significantly larger resonance (versus internal standard – toluene) at 192 ppm (free  $^{13}CS_2$ ) compared to  $^{13}C$  NMR of the reaction of  $Ni_2L^1(^{13}CS_2)$  with 2 equiv of  $[FeCp_2](PF_6)$  (See Figure S15).

**Reaction of  $Ni_2L^1(CS_2)_2$  with  $PPh_3$ .** A solution of 12 mg of  $Ni_2L^2(CS_2)$  in  $DMSO-d_6$  was treated with 2 equiv of  $PPh_3$  (11 mg, 0.042 mmol). No color change was observed. The solution was stirred overnight at RT.  $^1H$  and  $^{31}P$  NMR spectra demonstrated only starting materials present (See Figure S18 for  $^1H$  NMR and Figure S19 for  $^{31}P$  NMR).

### 3. X-ray crystallographic details

Structures of **2-4** were confirmed by X-ray analysis. The crystals were mounted on a Bruker APEXII/Kappa three circle goniometer platform diffractometer equipped with an APEX-2 detector. A graphic monochromator was employed for wavelength selection of the Mo K $\alpha$  radiation ( $\lambda = 0.71073$  Å). The data were processed and refined using the program SAINT supplied by Siemens Industrial Automation. Structures were solved by direct methods in SHELXS and refined by standard difference Fourier techniques in the SHELXTL program suite (6.10 v., Sheldrick G. M., and Siemens Industrial Automation, 2000). Hydrogen atoms were placed in calculated positions using the standard riding model and refined isotropically; all other atoms were refined anisotropically. In the structure of **2**,  $Ni_2L^1(CS_2)_2$  occupies a special position. The structure of **4** contained two crystallographically independent molecules of  $L^2Ni(CS_2)$ , displaying slightly different metrics (Figure S1).

#### 4. X-ray structure of **4**

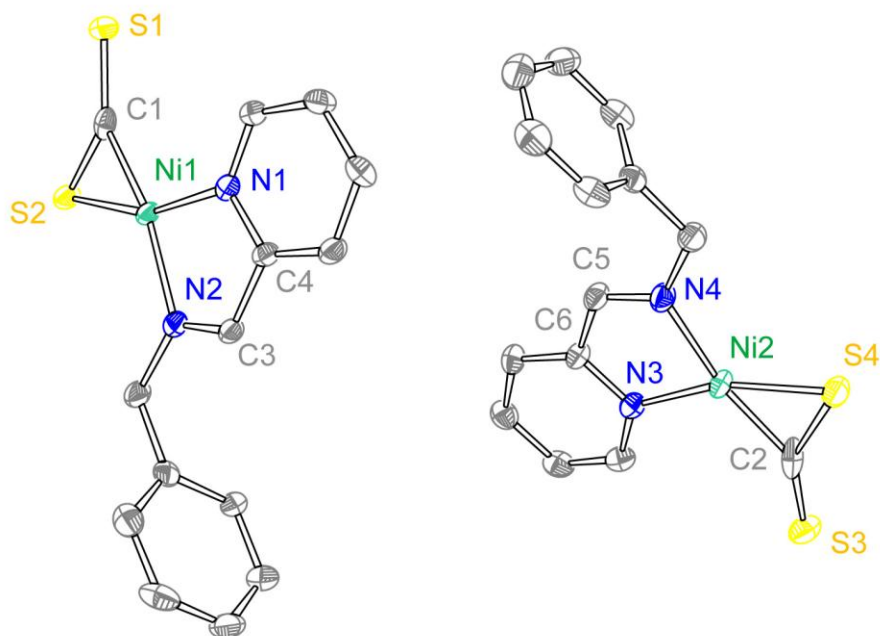

**Figure S1.** X-ray structure of **4**, 50% probability ellipsoids. Selected bond distances: S1 C1 1.548(8) Å, S2 C1 1.745(8) Å, S3 C2 1.617(7) Å, S4 C2 1.686(7) Å, N2 C3 1.271(7) Å, C3 C4 1.454(7) Å, N4 C5 1.267(7) Å, C5 C6 1.468(7) Å.

## 5. $^1\text{H}$ , $^{13}\text{C}$ and $^{31}\text{P}$ -NMR Spectra

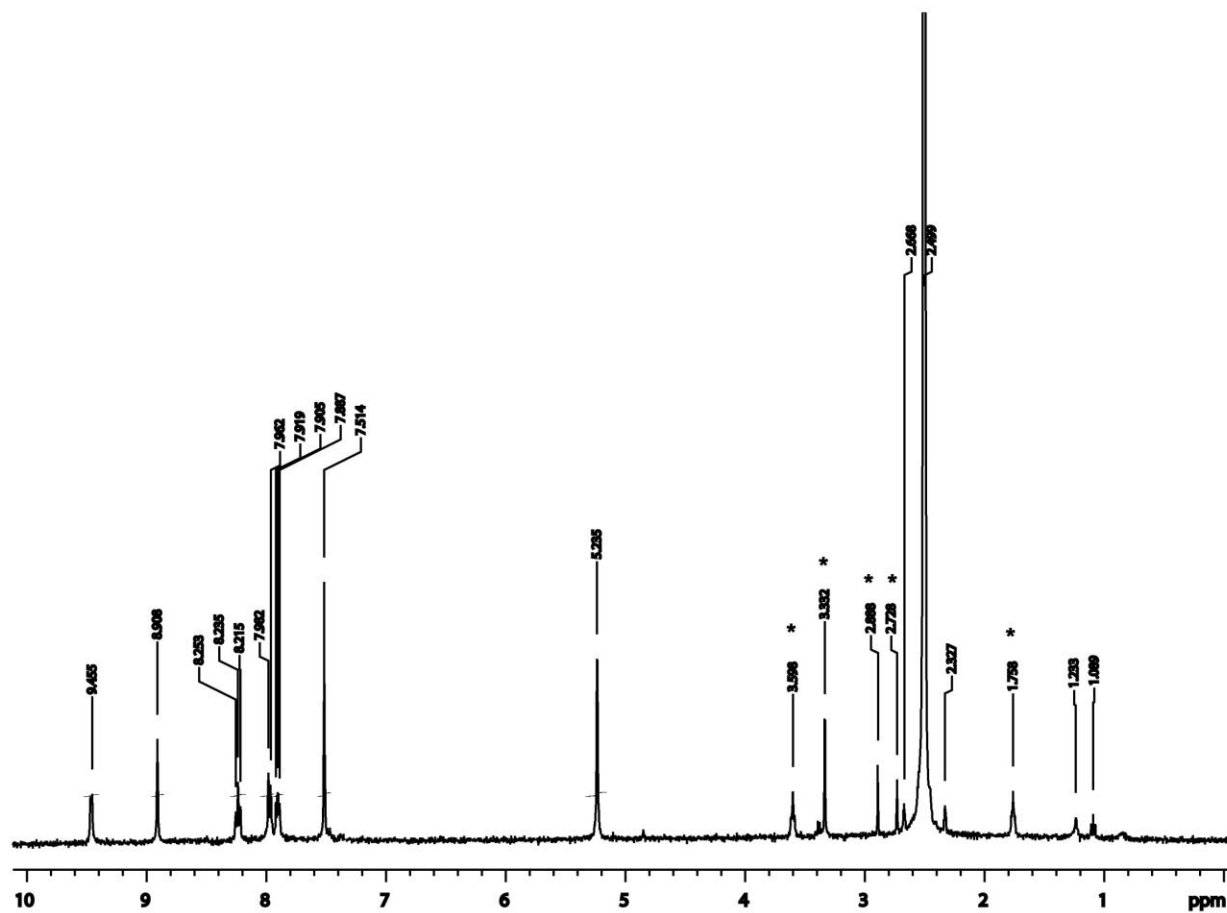

**Figure S2.**  $^1\text{H}$  NMR of  $\text{Ni}_2(\text{L}^1)(\text{CS}_2)_2$  (**2**). Solvent peaks (indicated by \*): 3.598: THF; 3.332:  $\text{H}_2\text{O}$ ; 1.759: THF; 2.888: DMF; 2.728: DMF.

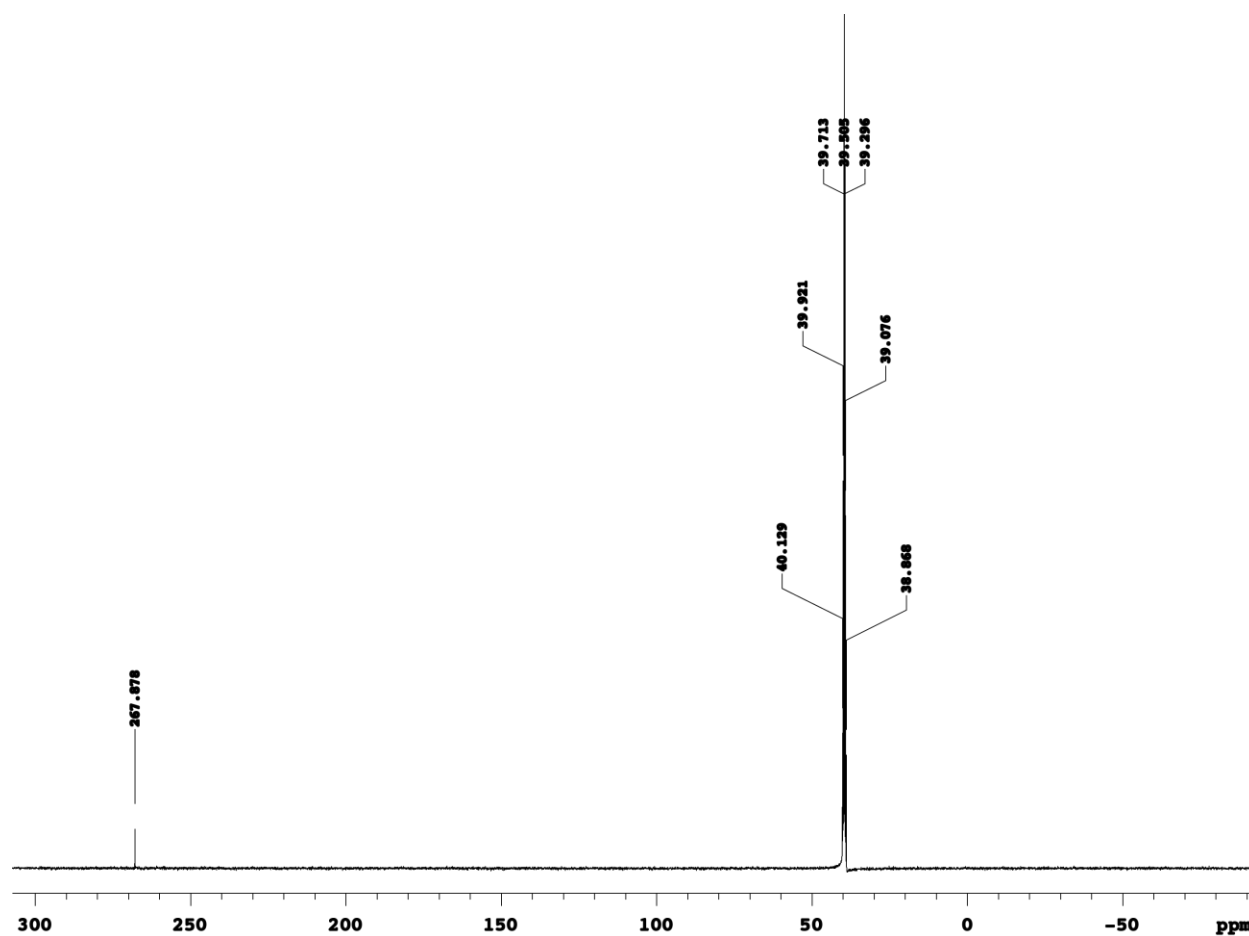

**Figure S3.**  $^{13}\text{C}$  NMR of  $\text{Ni}_2(\text{L}^1)(^{13}\text{CS}_2)_2$  ( $2\text{-}^{13}\text{CS}_2$ ).

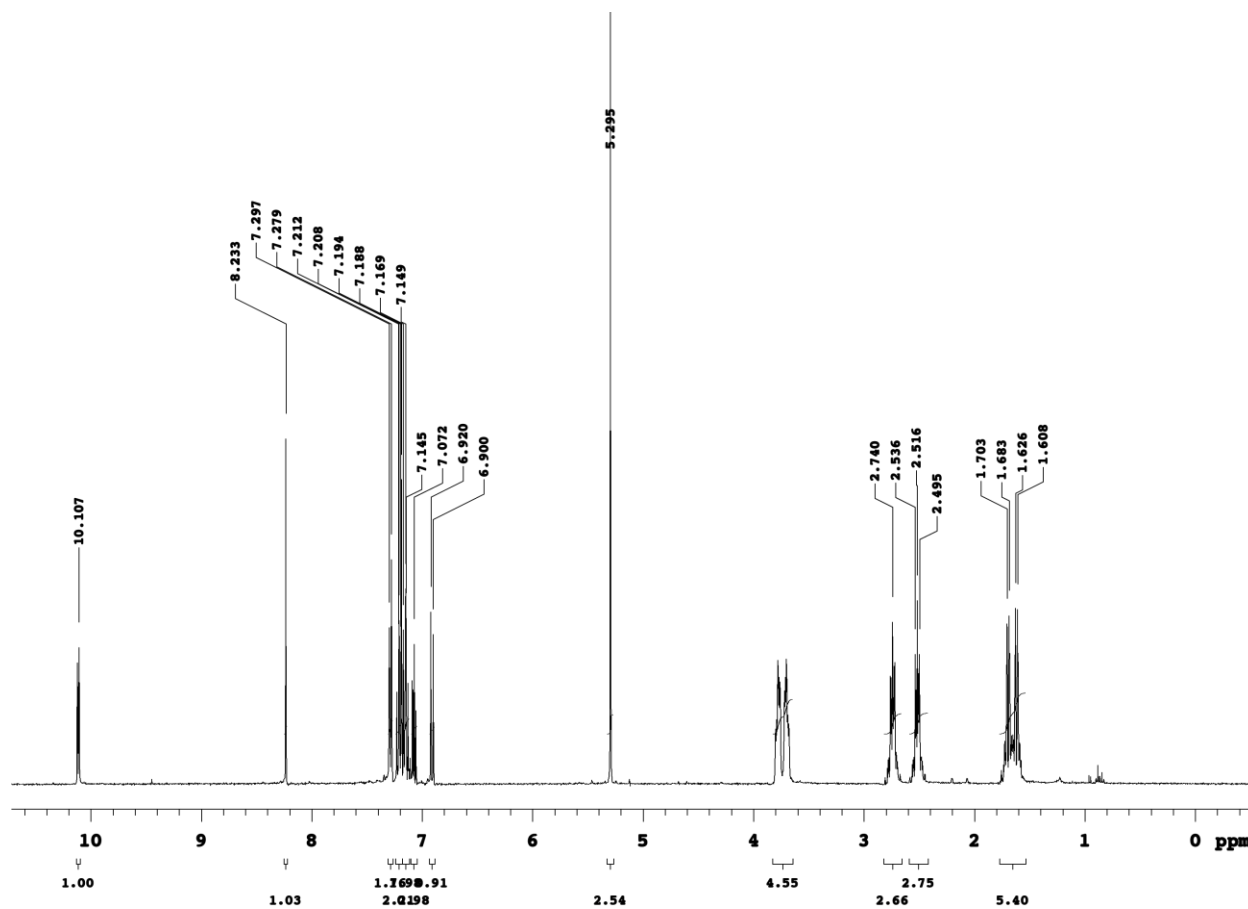

**Figure S4.**  $^1\text{H}$  NMR of  $\text{Ni}(\text{L}^2)(\text{COD})$  (**3**).

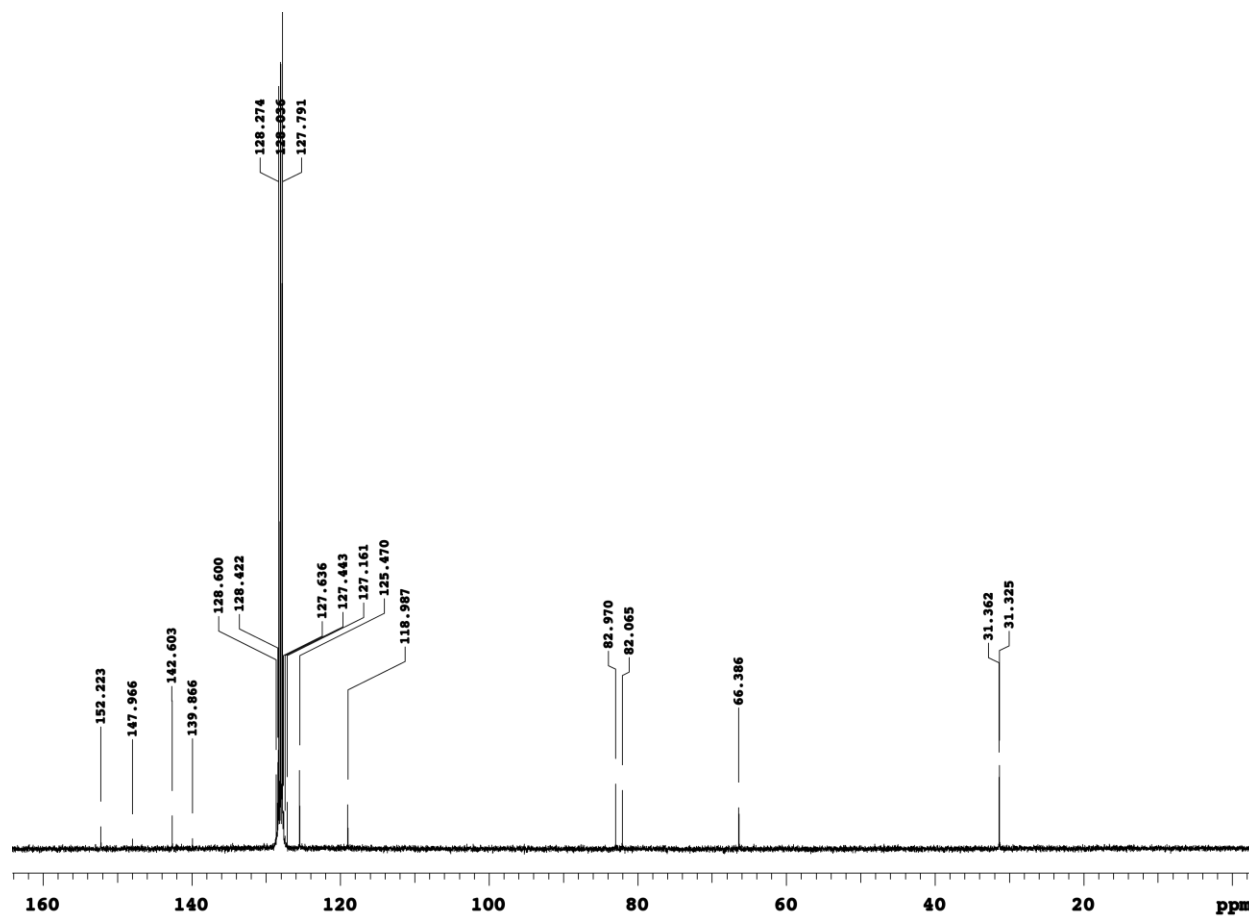

Figure S5.  $^{13}\text{C}$  NMR of  $\text{Ni}(\text{L}^2)(\text{COD})$  (3).



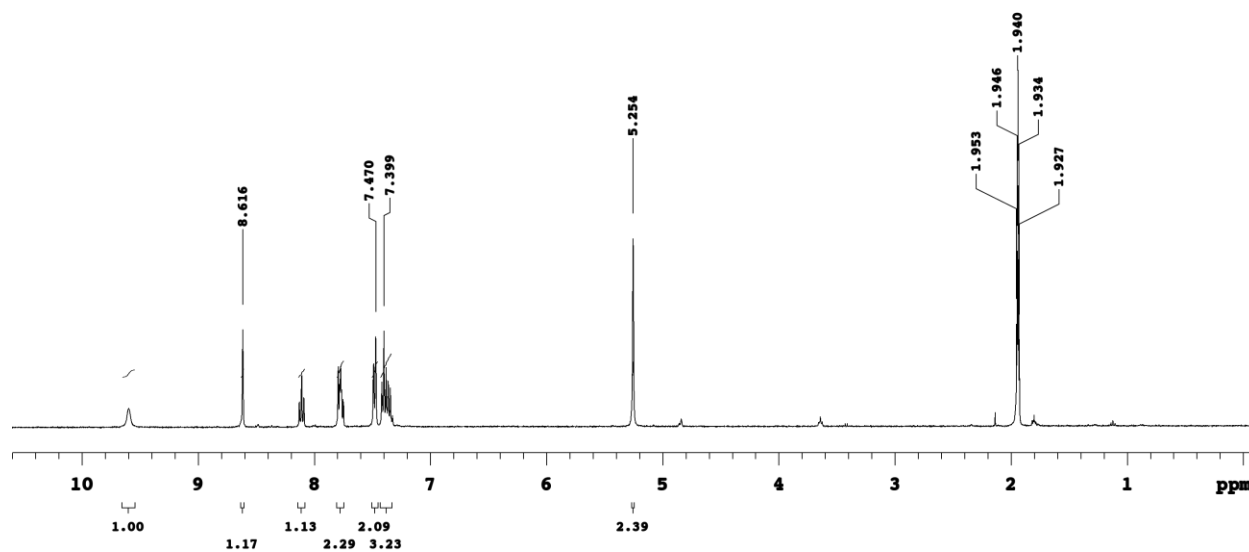

**Figure S6.**  $^1\text{H}$  NMR of  $\text{Ni}(\text{L}^2)(\text{CS}_2)$  (**4**) in  $\text{CD}_3\text{CN}$ .

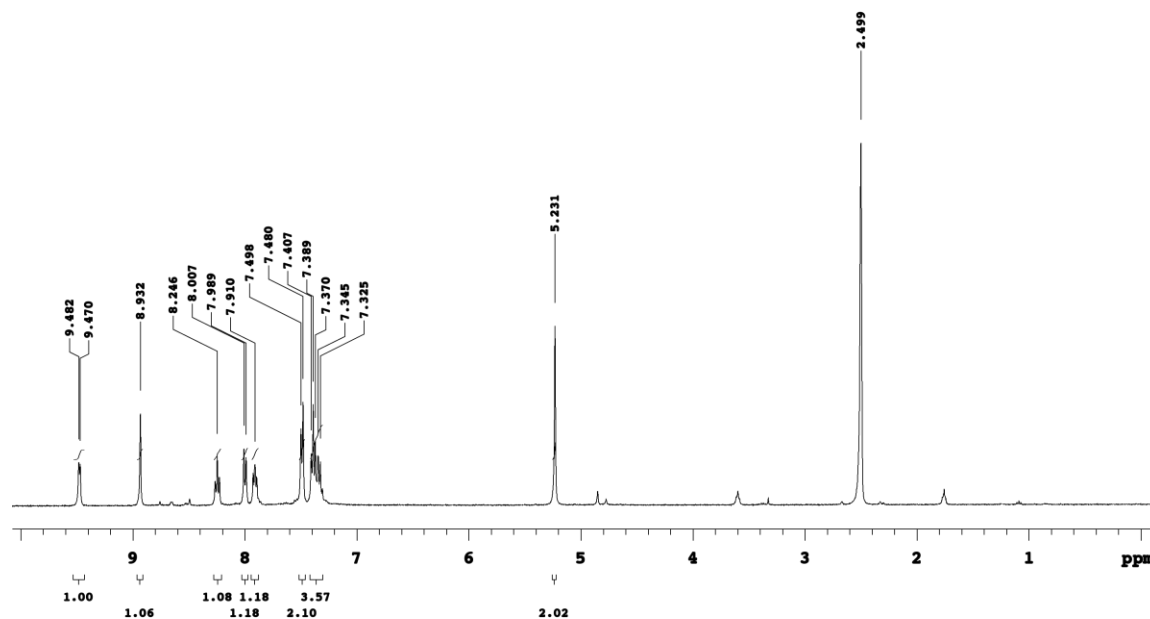

**Figure S7.** <sup>1</sup>H NMR of **4** in DMSO.

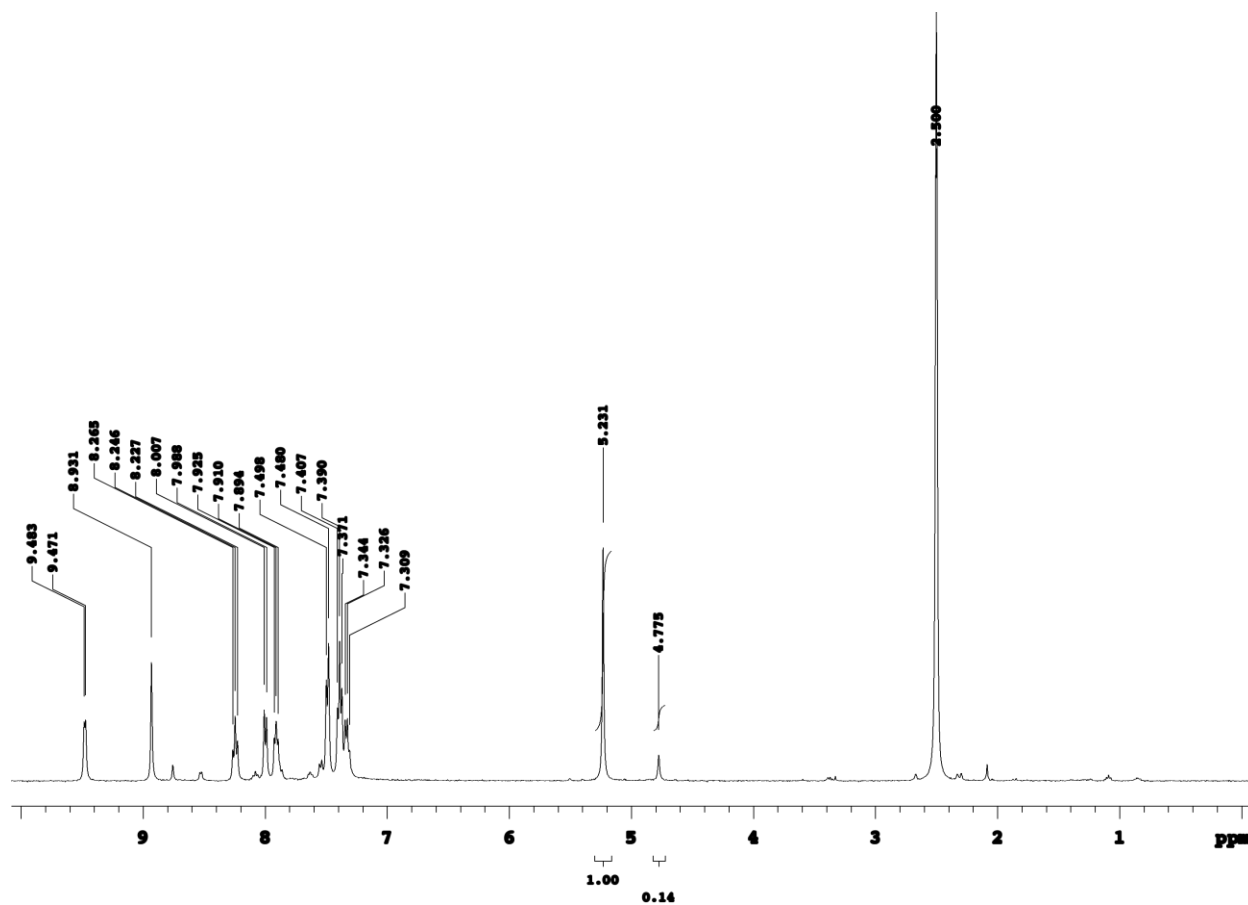

**Figure S8.**  $^1\text{H}$  NMR of **4** after 10 min at RT (in DMSO). Ratio between peaks at 5.331 and 4.775 (decomposition product) is 1 : 0.14.

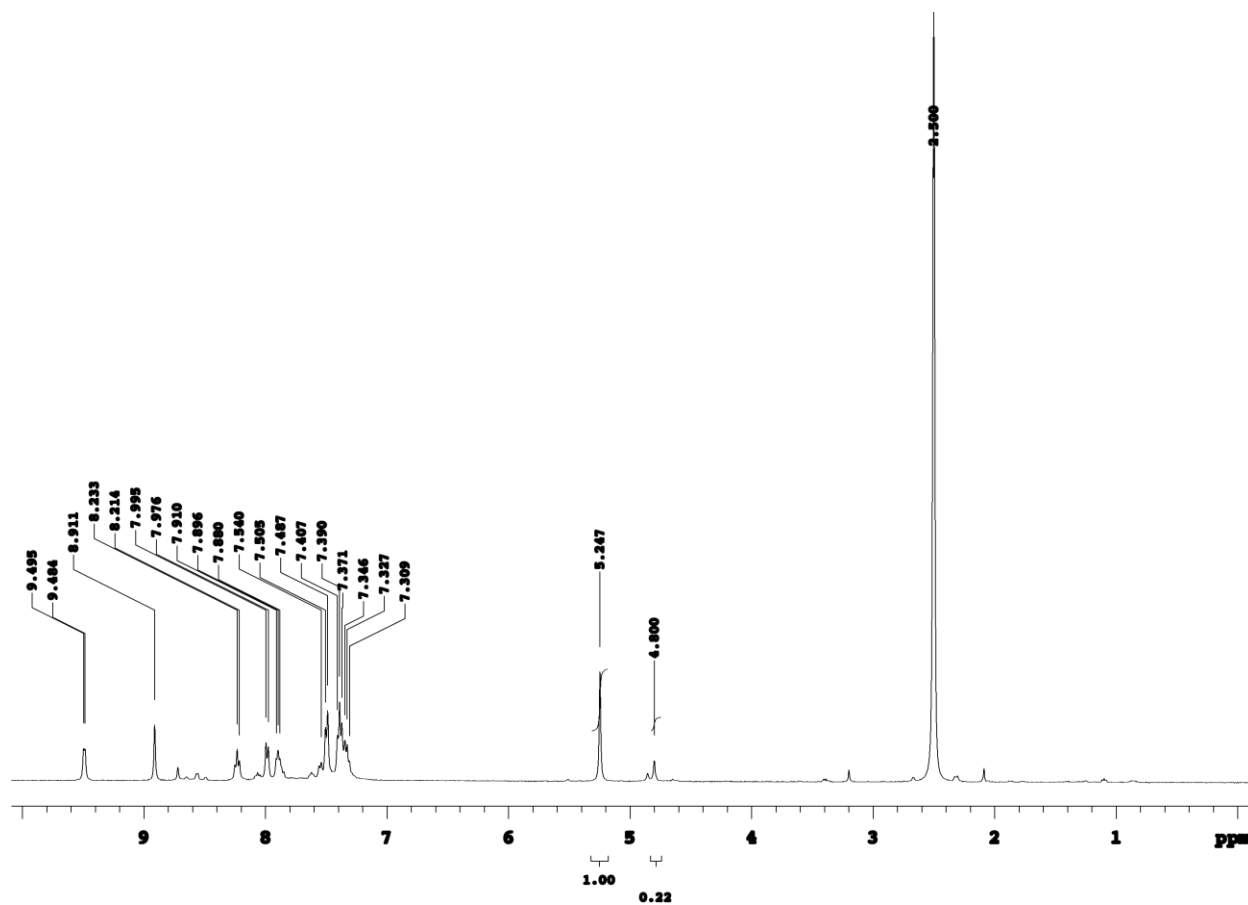

**Figure S9.**  $^1\text{H}$  NMR of **4** after 60 min at 50 °C. Ratio between peaks at 5.247 and 4.800 (decomposition product) is 1 : 0.22.

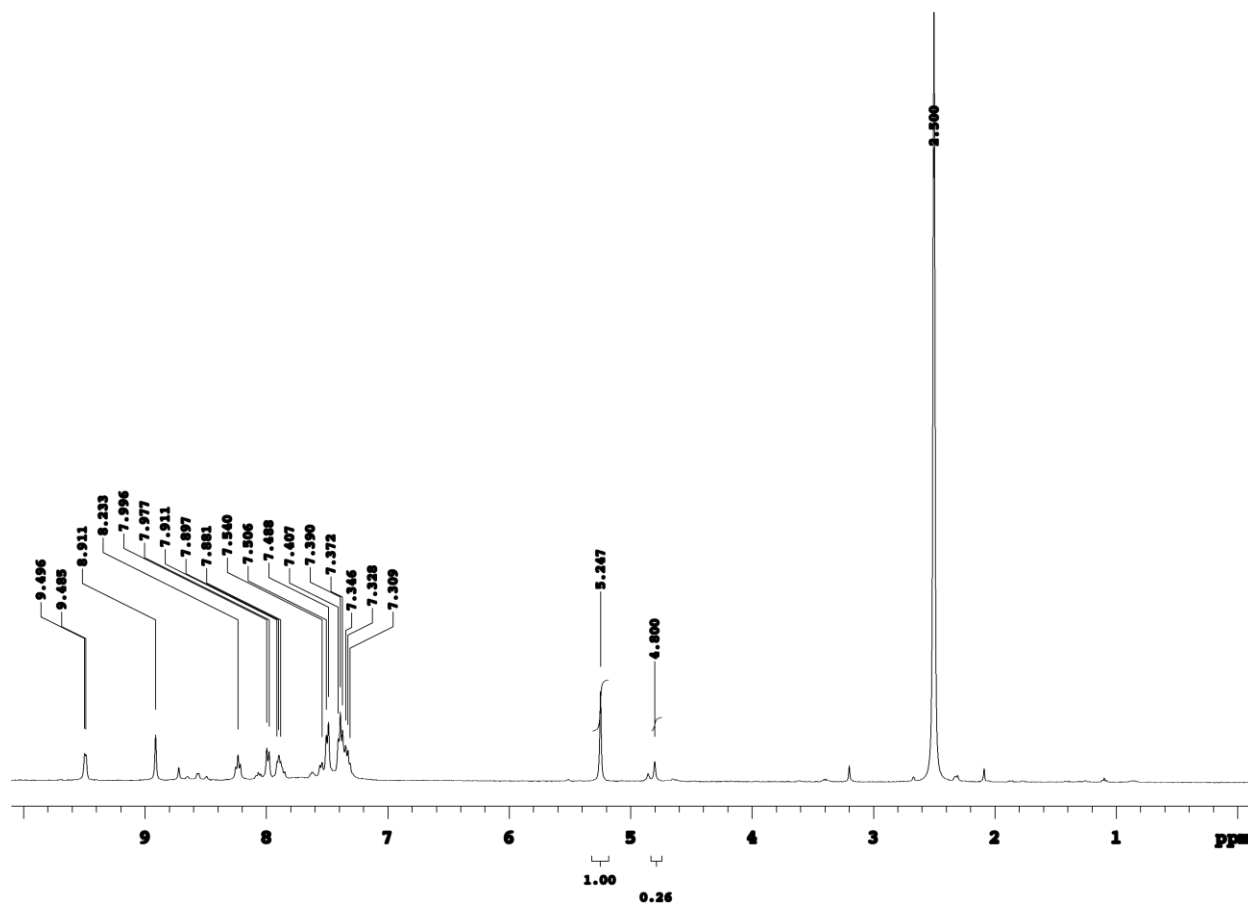

**Figure S10.**  $^1\text{H}$  NMR of **4** after 90 min at 50 °C. Ratio between peaks at 5.247 and 4.800 (decomposition product) is 1 : 0.26.

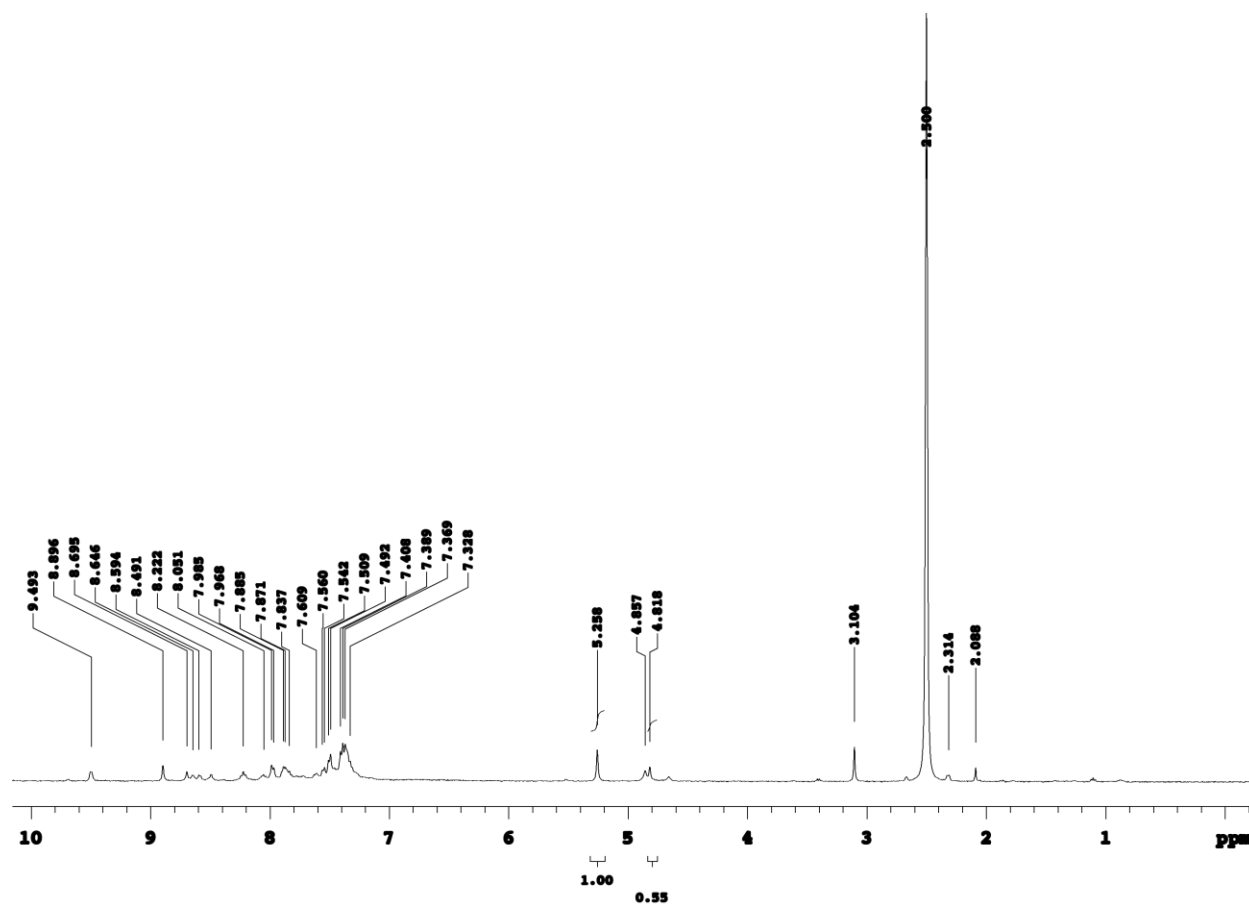

**Figure S11.**  $^1\text{H}$  NMR of **4** after 90 min at 50 °C followed by 60 min at 70 °C. Ratio between peaks at 5.258 and 4.818 is 1 : 0.55.

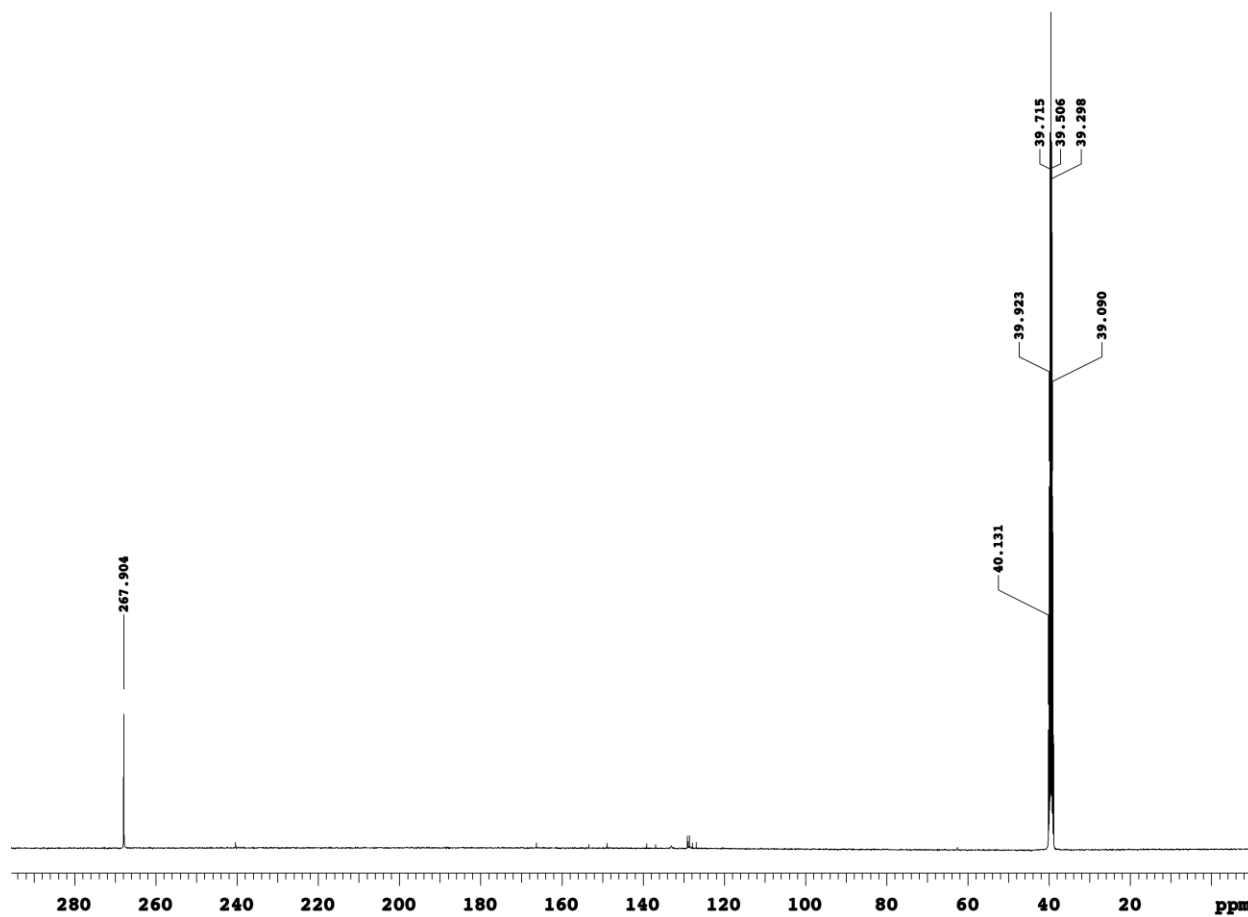

**Figure S12.**  $^{13}\text{C}$  NMR of 4- $^{13}\text{CS}_2$  showing  $^{13}\text{CS}_2$  signal.

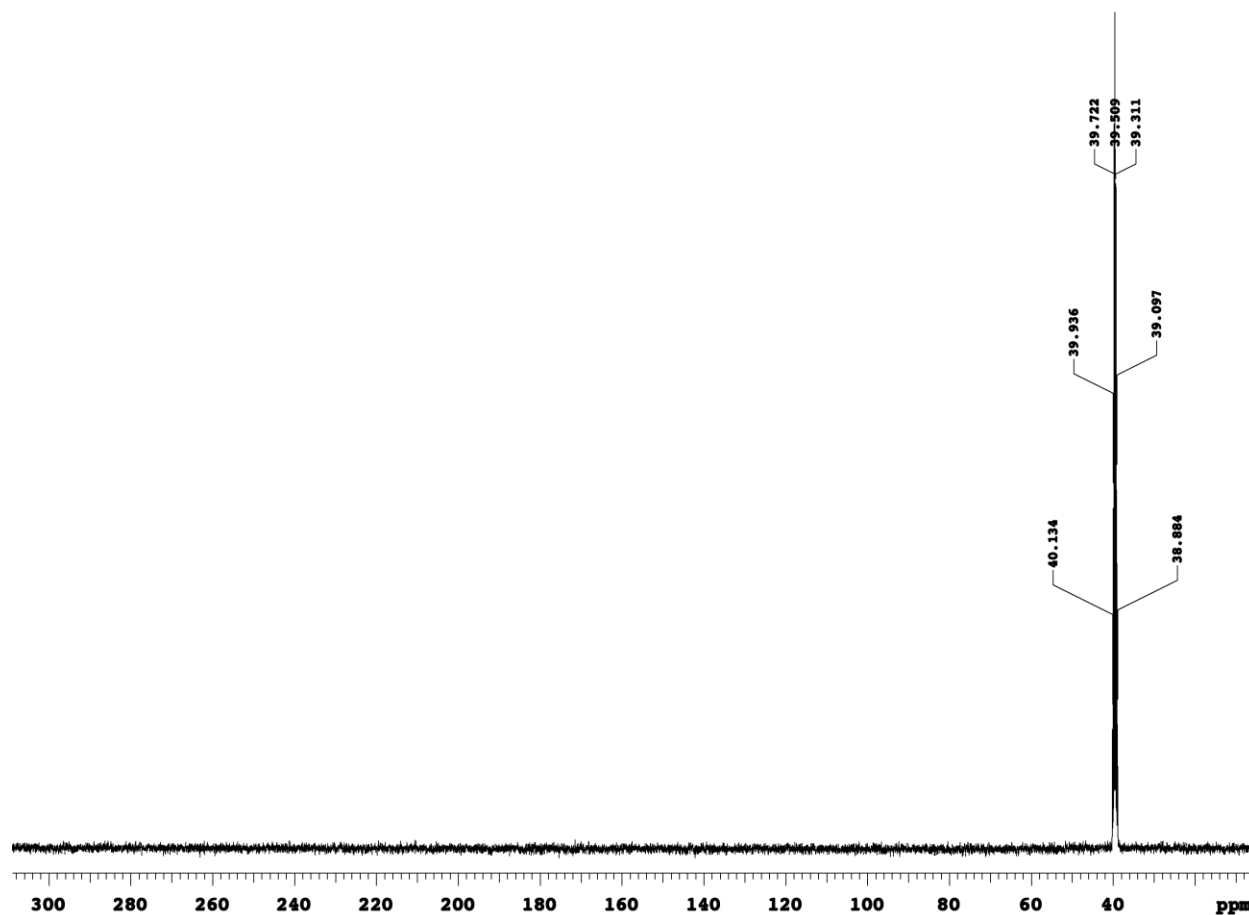

**Figure S13.**  $^{13}\text{C}$  NMR of reaction of  $\text{Ni}_2\text{L}^2(^{13}\text{CS}_2)_2$  ( $2\text{-}^{13}\text{CS}_2$ ) with unlabelled  $\text{CS}_2$  after 1 h.



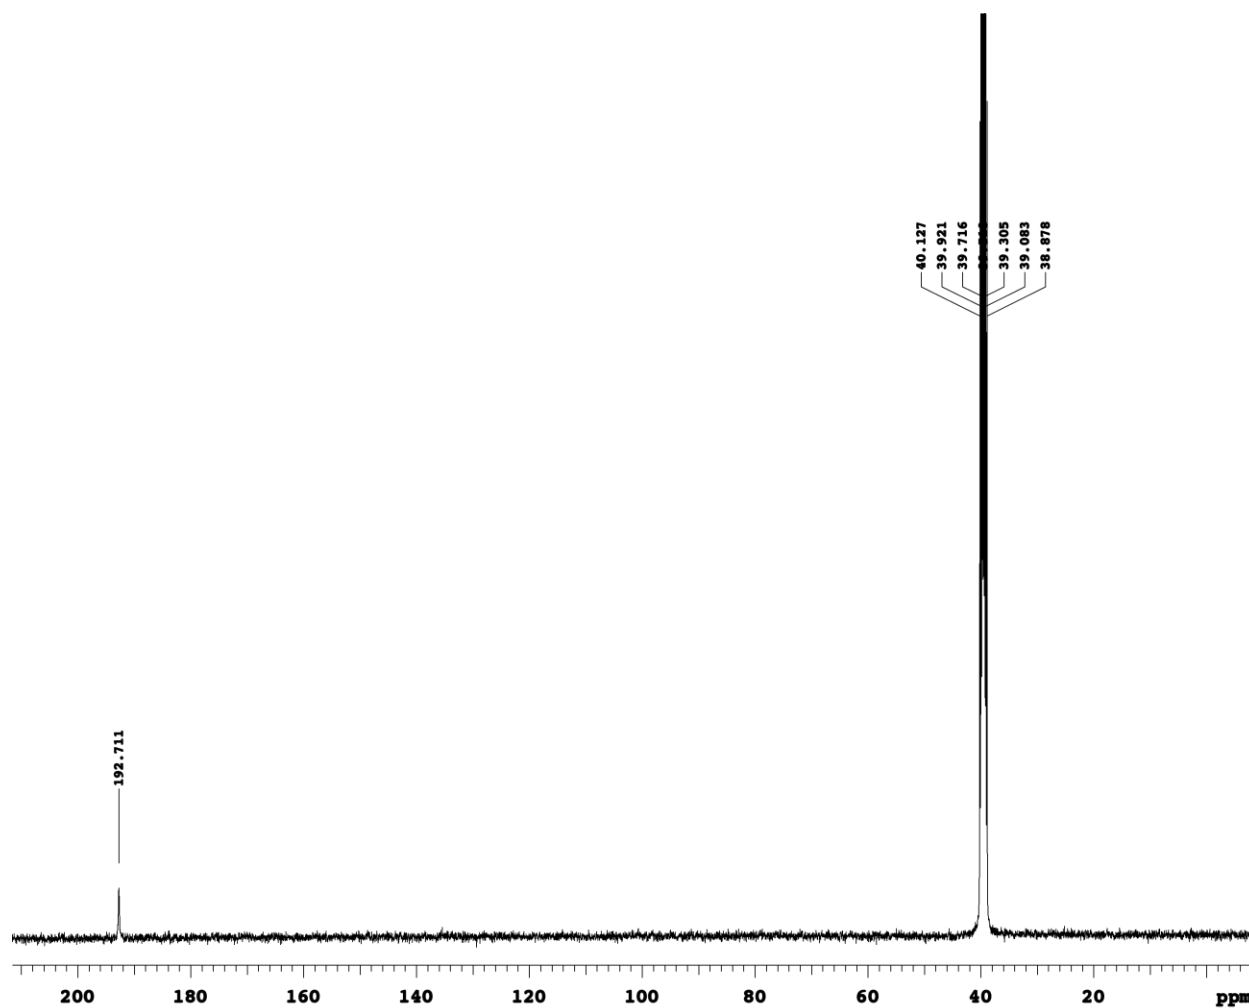

**Figure S14.**  $^{13}\text{C}$  NMR of reaction of  $\text{Ni}_2\text{L}^2(^{13}\text{CS}_2)_2$  ( $2\text{-}^{13}\text{CS}_2$ ) with unlabelled  $\text{CS}_2$  after 12 h

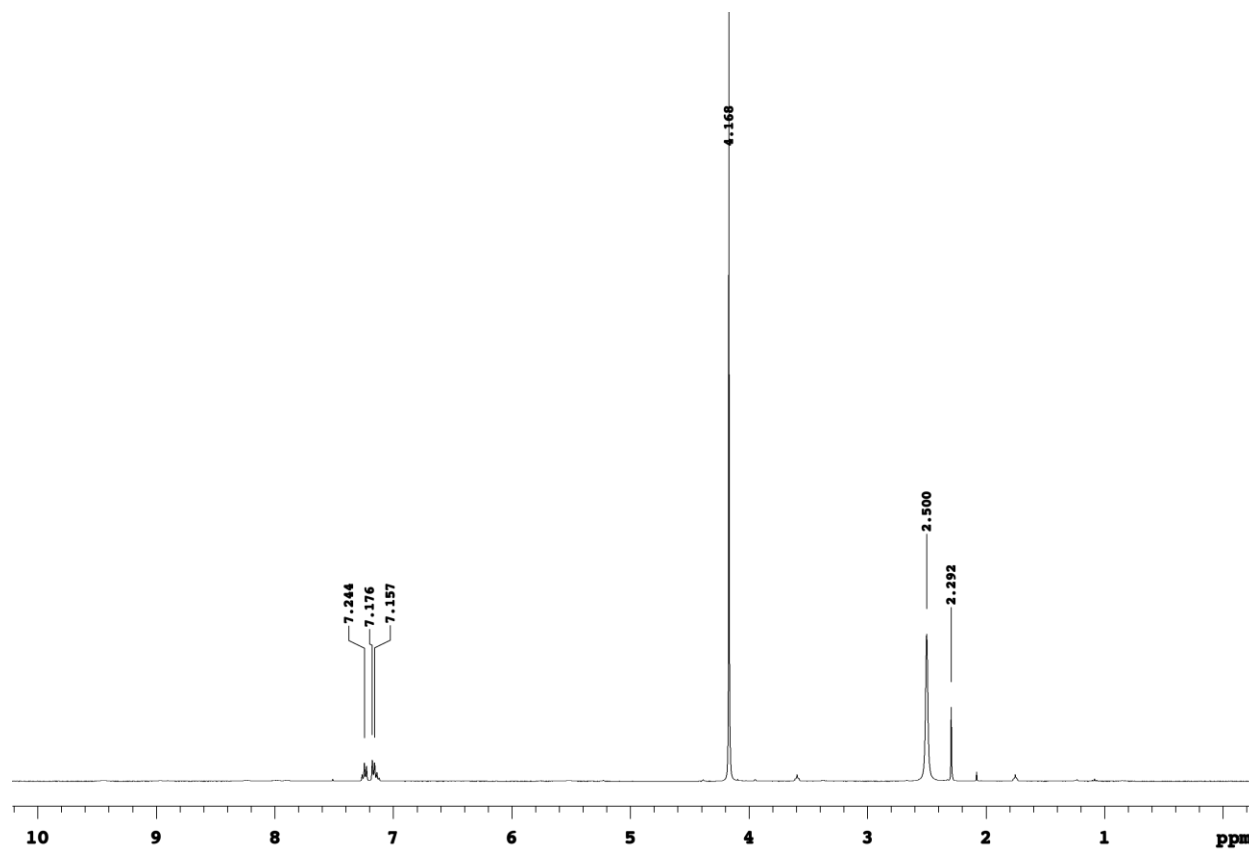

**Figure S15.**  $^1\text{H}$  NMR of  $\text{Ni}_2\text{L}^2(^{13}\text{CS}_2)_2$  ( $2\text{-}^{13}\text{CS}_2$ ) with 2 equiv of  $[\text{FeCp}_2](\text{PF}_6)$  (the spectrum contains toluene as an internal standard).

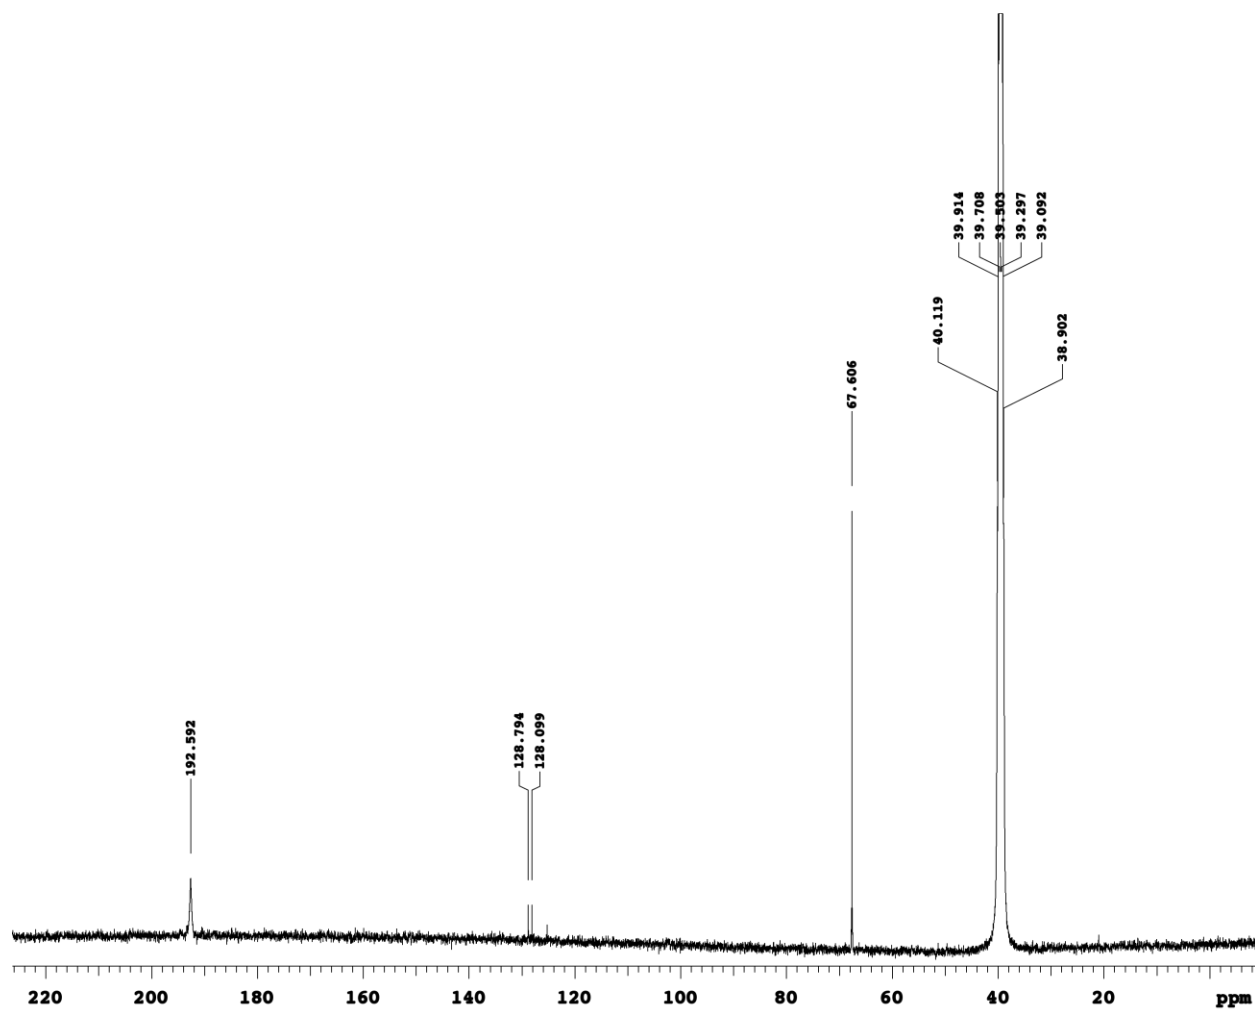

**Figure S16.**  $^{13}\text{C}$  NMR of  $\text{Ni}_2\text{L}^2(^{13}\text{CS}_2)_2$  ( $2\text{-}^{13}\text{CS}_2$ ) with 2 equiv. of  $[\text{FeCp}_2](\text{PF}_6)$ .

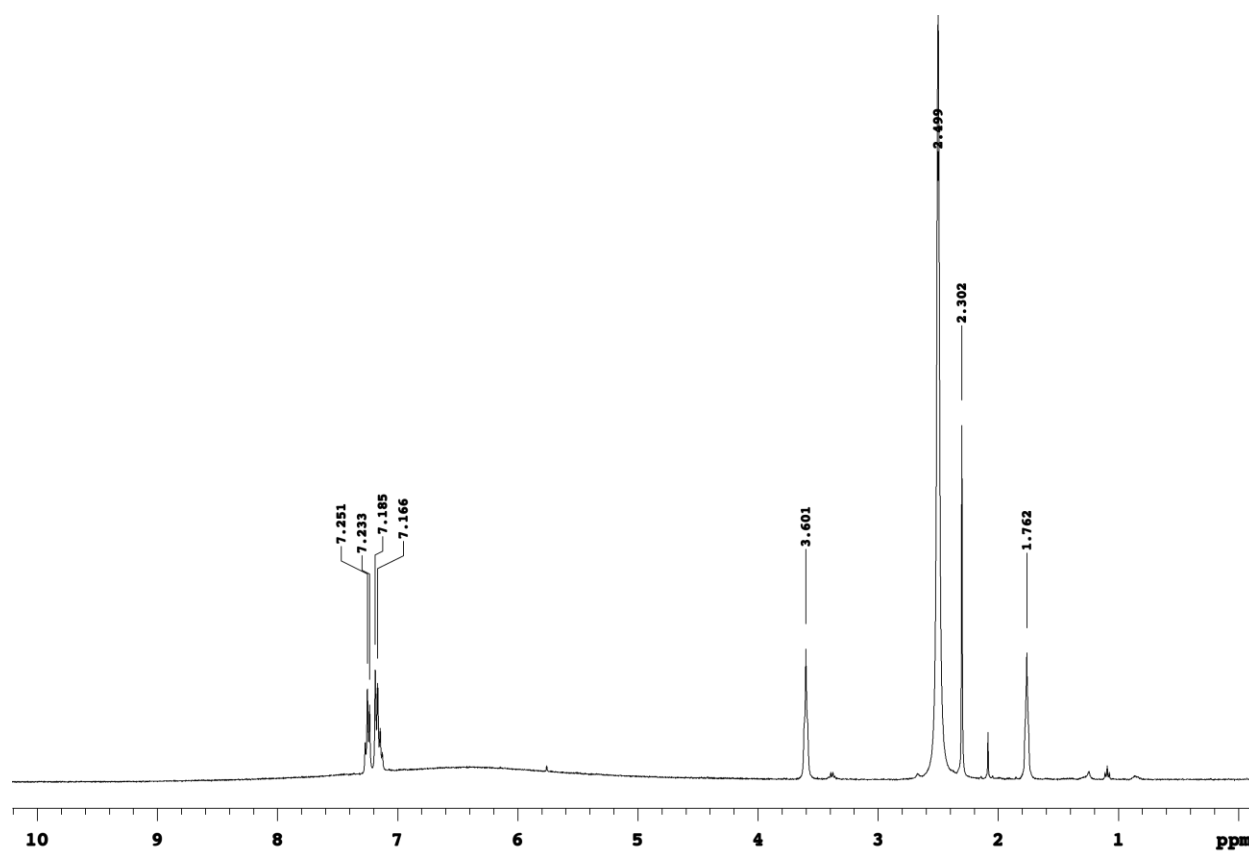

**Figure S17.**  $^1\text{H}$  NMR of  $\text{Ni}_2\text{L}^2(^{13}\text{CS}_2)_2$  ( $2\text{-}^{13}\text{CS}_2$ ) with 4 equiv of  $[\text{FeCp}_2](\text{PF}_6)$ .

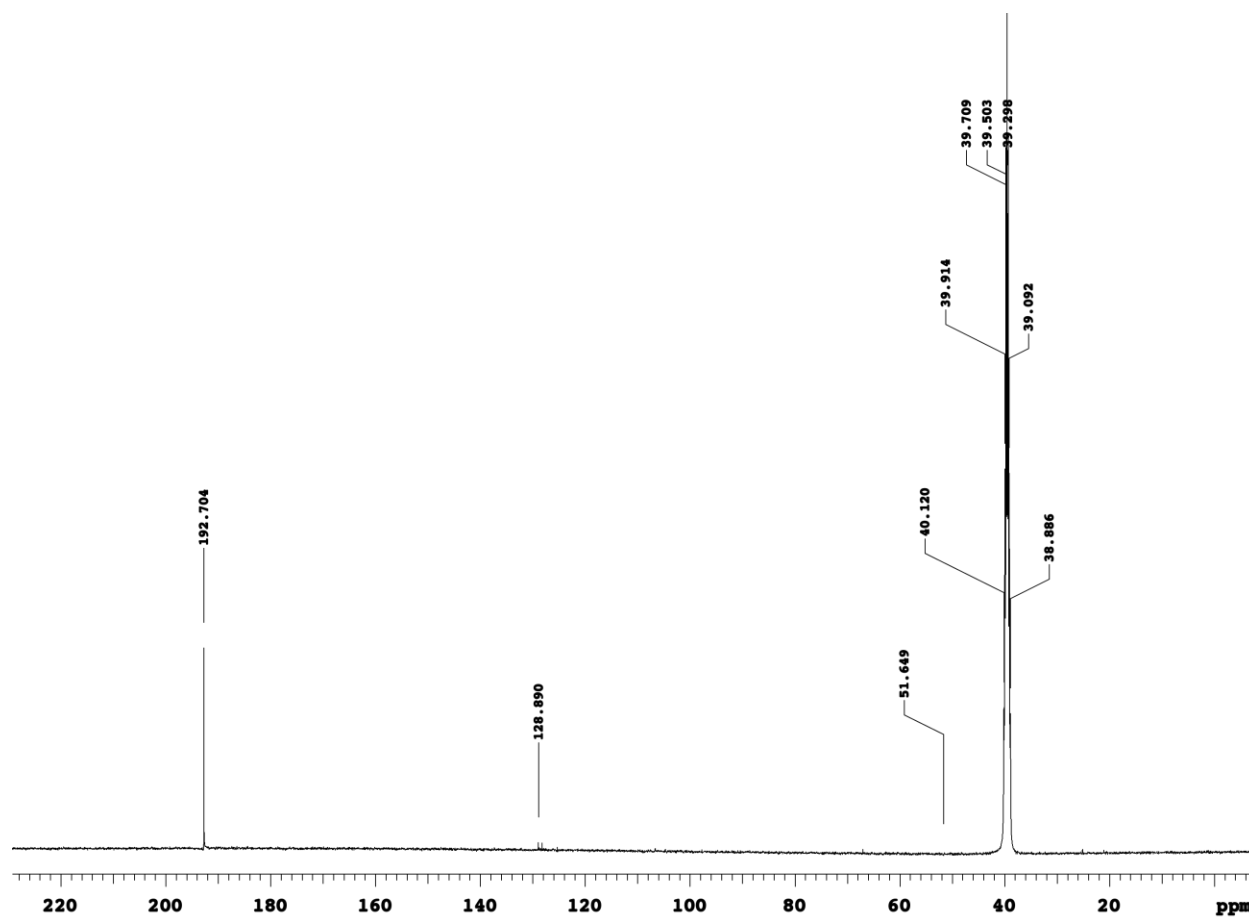

**Figure S18.**  $^{13}\text{C}$  NMR of  $\text{Ni}_2\text{L}^2(^{13}\text{CS}_2)_2$  ( $2\text{-}^{13}\text{CS}_2$ ) with 4 equiv of  $[\text{FeCp}_2](\text{PF}_6)$ .

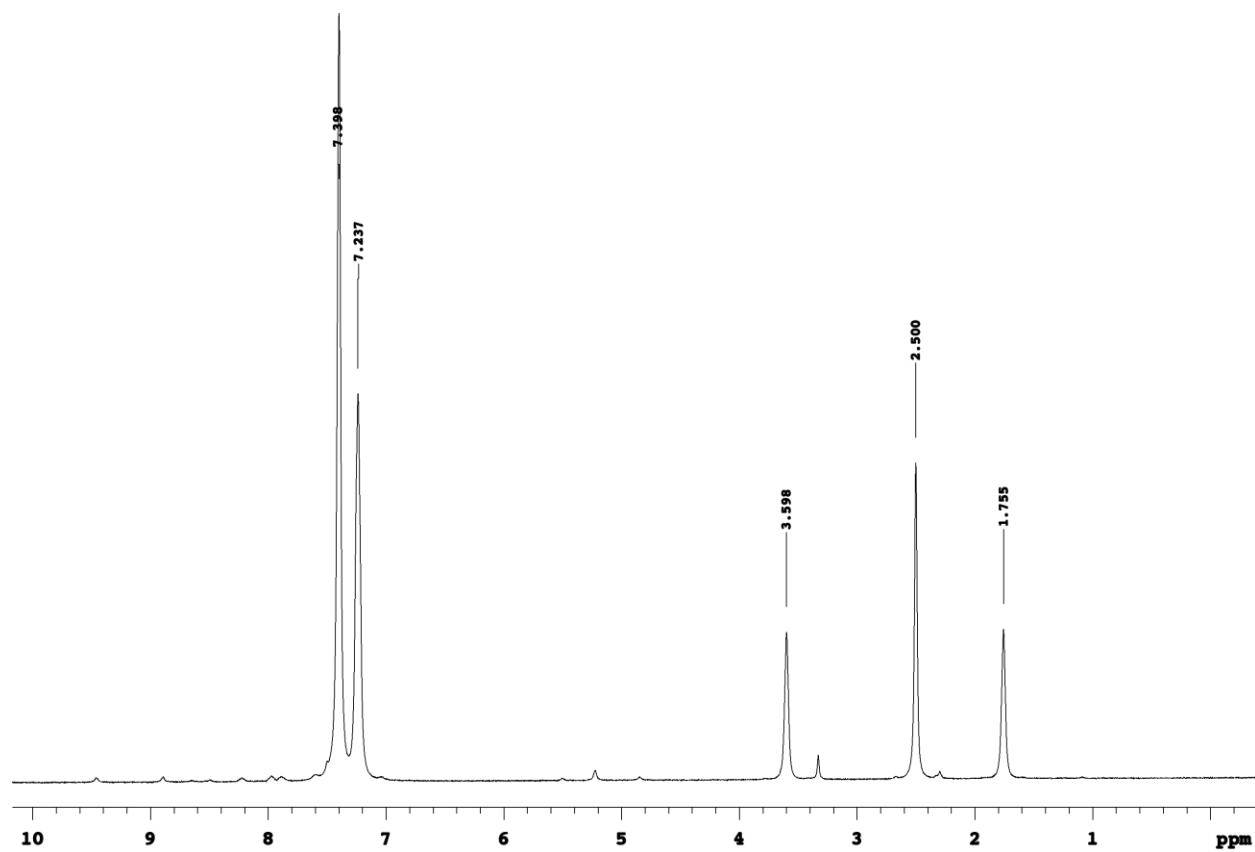

**Figure S19.**  $^1\text{H}$  NMR of  $\text{Ni}_2\text{L}^1(\text{CS}_2)_2$  (**2**) and  $\text{PPh}_3$ .

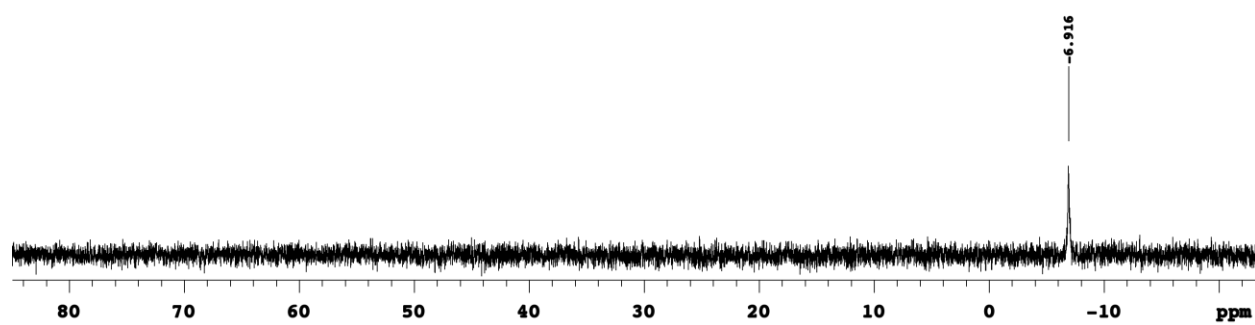

**Figure S20.**  $^{31}\text{P}$  NMR of  $\text{Ni}_2\text{L}^1(\text{CS}_2)_2$  (**2**) and  $\text{PPh}_3$

6. Mass Spectra

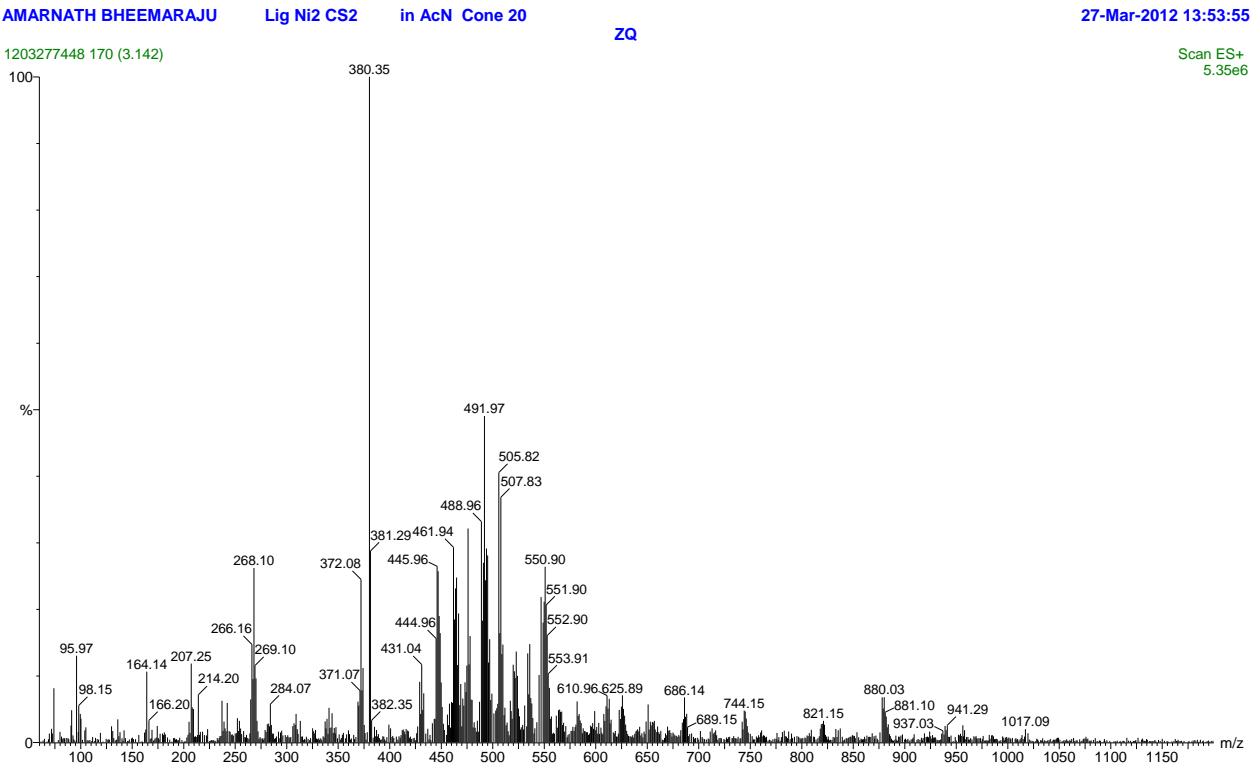

Figure S21. MS of Ni<sub>2</sub>L<sup>1</sup>(CS<sub>2</sub>)<sub>2</sub> (**2**).



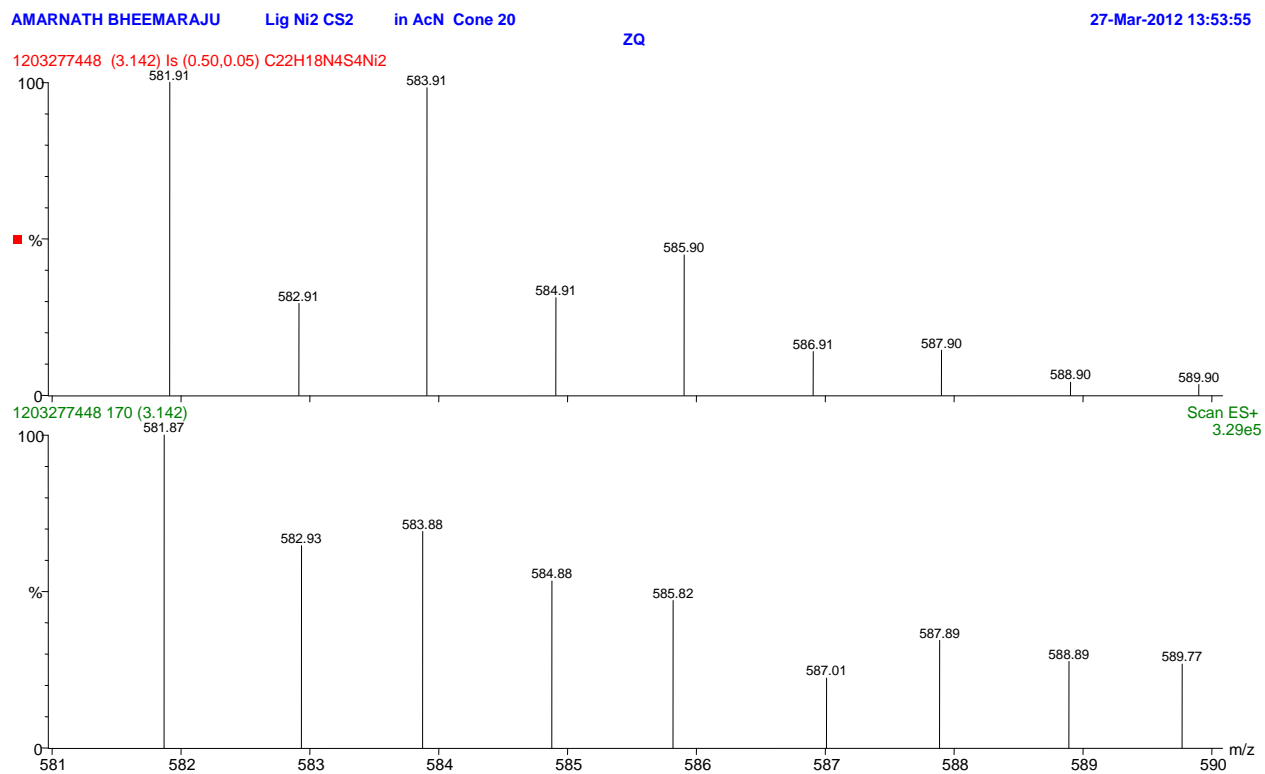

**Figure S22.** Peak attributed to  $[\text{Ni}_2\text{L}^1(\text{CS}_2)_2]^+$  ( $2^+$ ). Above: calcd for  $[\text{Ni}_2(\text{L}^1)(\text{CS}_2)_2]^+$  581.9.  
Below: found 581.8.

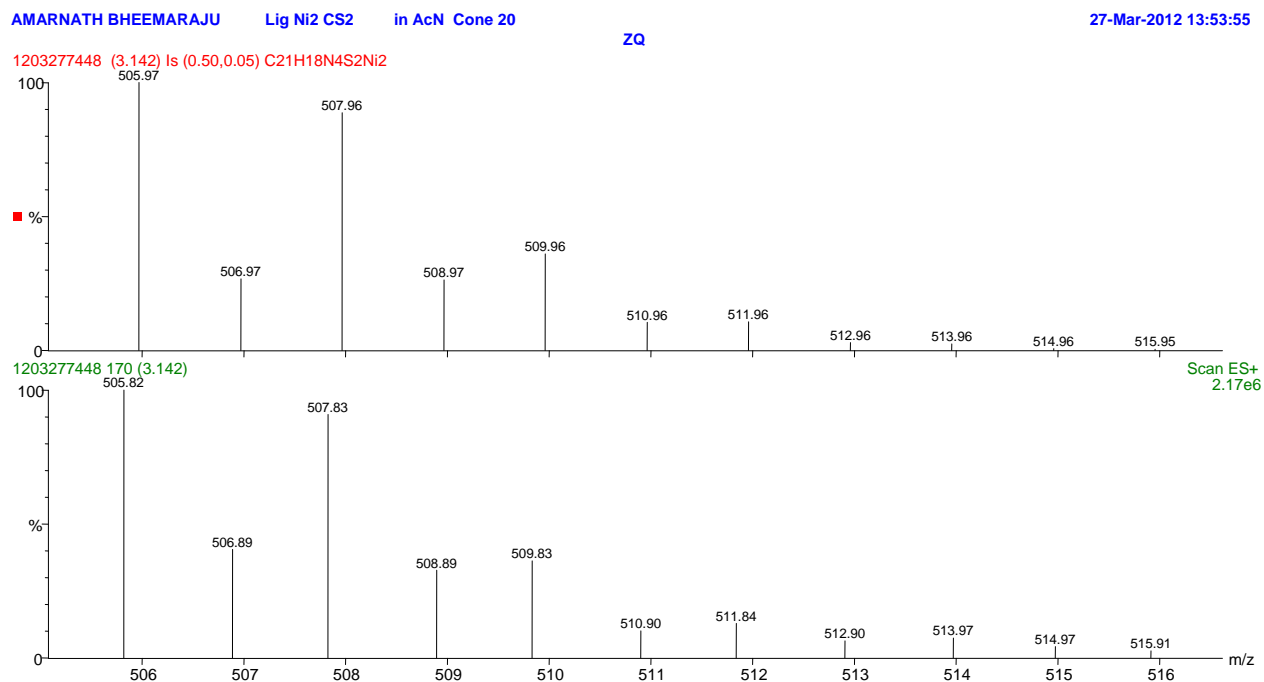

**Figure S23.** Peak attributed to  $[(\text{Ni}_2(\text{L}^1)\text{CS}_2)]^+$  ( $[\mathbf{2} - \text{CS}_2]^+$ ) Above: calcd for  $[\text{Ni}_2(\text{L}^1)(\text{CS}_2)]^+$  505.9. Below: found 505.8.

## 7. FT-IR Spectra

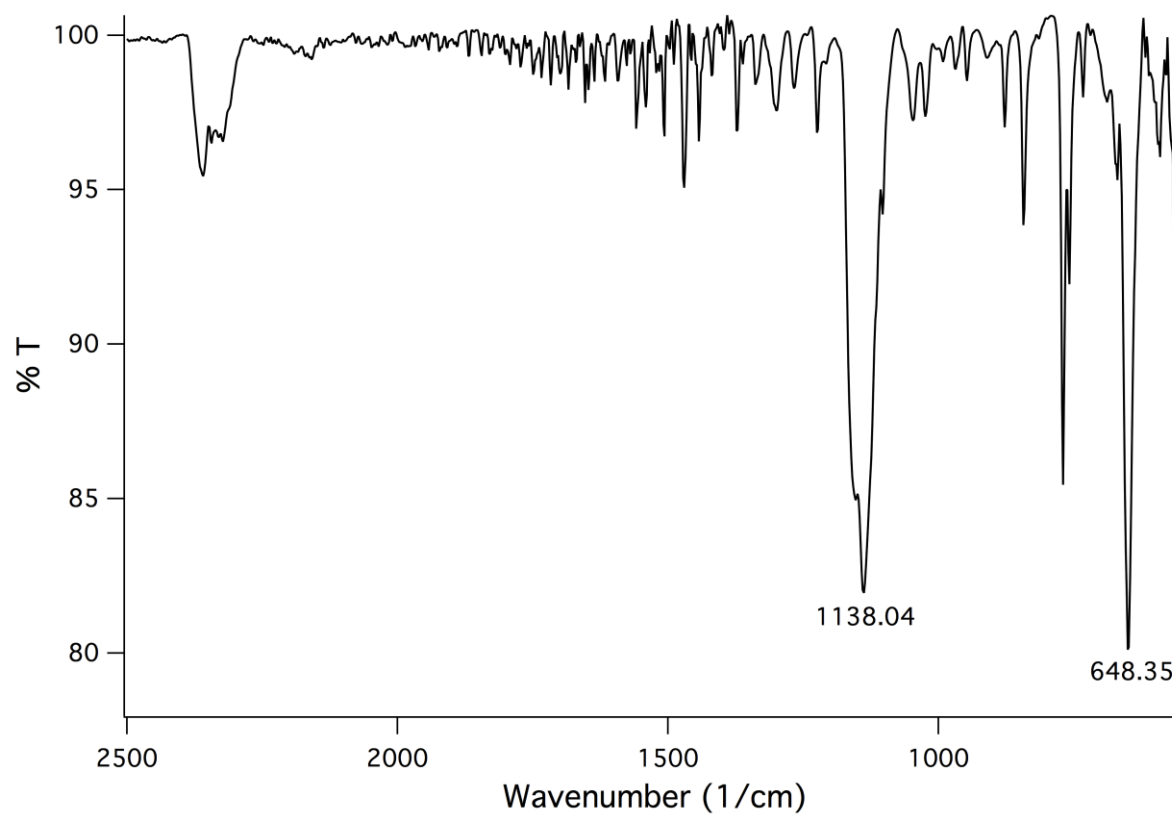

**Figure S24.** FT-IR spectra of  $\text{Ni}_2(\text{L}^1)(\text{CS}_2)_2$  (2).

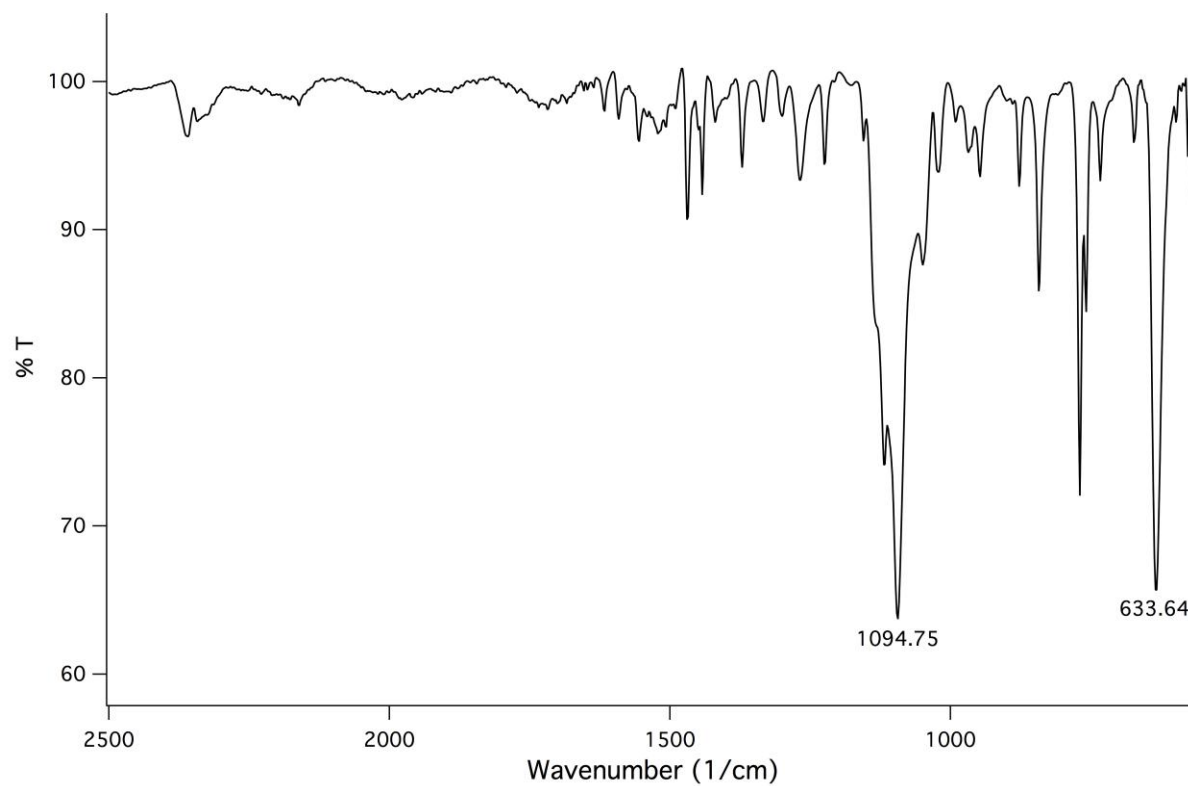

**Figure S25.** FT-IR spectra of  $\text{Ni}_2(\text{L}^1)(^{13}\text{CS}_2)_2(2\text{-}^{13}\text{CS}_2)$ .

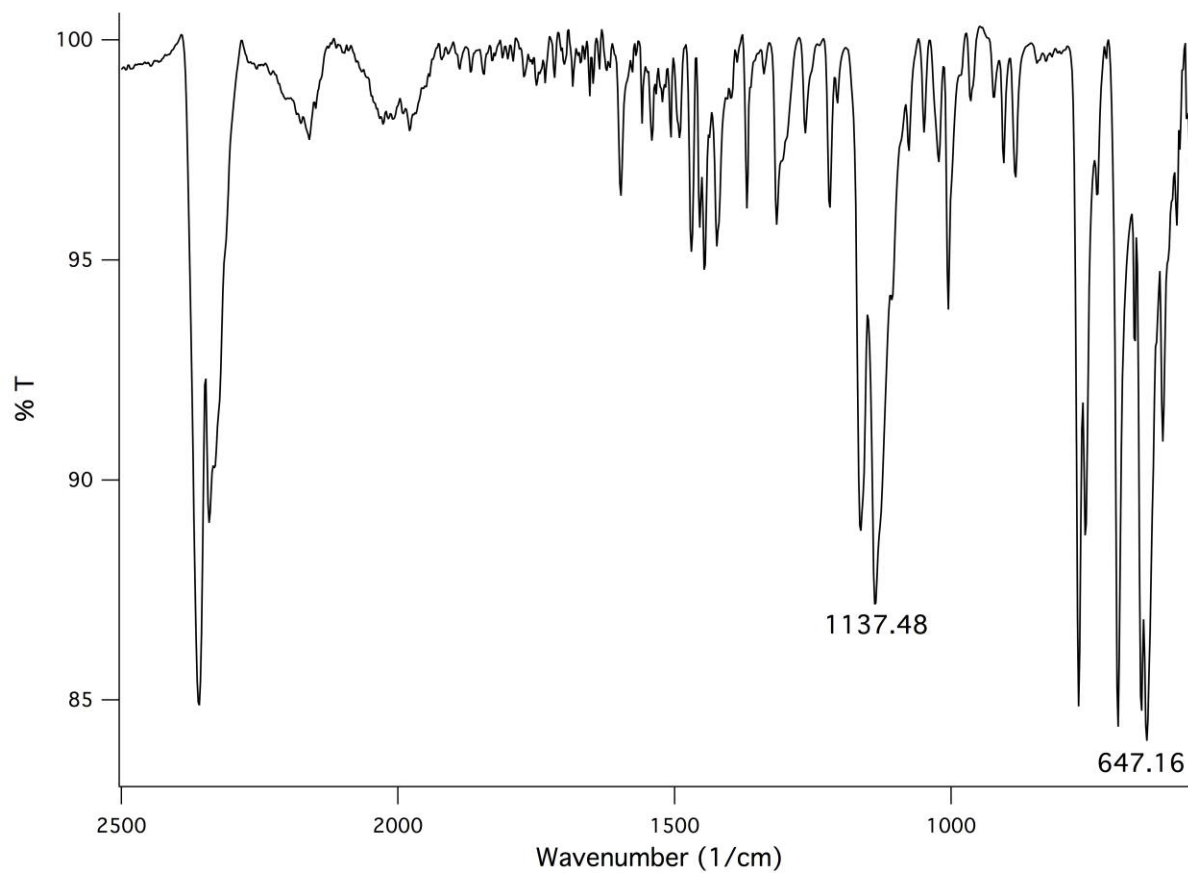

**Figure S26.** FT-IR spectra of Ni(L<sup>2</sup>)(CS<sub>2</sub>) (**4**).

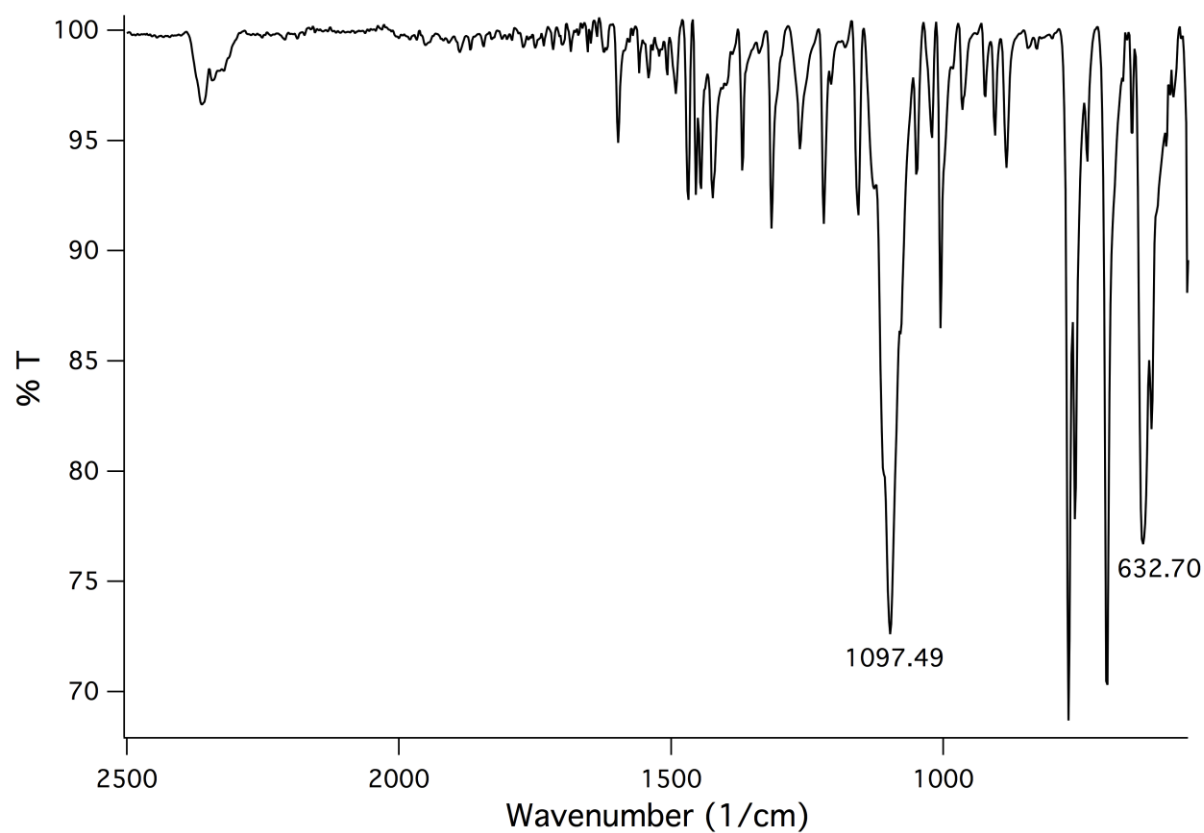

**Figure S27.** FT-IR spectra of  $\text{Ni}(\text{L}^2)(^{13}\text{CS}_2)$  ( $4\text{-}^{13}\text{CS}_2$ ).

**8. Computational Details.** Electronic structure calculations were carried out using density functional theory (DFT)<sup>3</sup> as implemented in Gaussian09.<sup>4</sup> Geometry optimizations were performed at the BP86/LANL2DZ/6-31G(d,p)<sup>5,6,7,8,9</sup> level of theory with no symmetry constraints. We chose to use a pure functional here, BP86 compared to B3LYP in our previous report,<sup>1</sup> to allow for the use of density fitting<sup>10</sup> which significantly sped up geometry optimizations for the dinickel complex. All optimized structures were confirmed to have stable wavefunctions,<sup>11,12</sup> and to be local minima by analyzing the harmonic frequencies.<sup>13</sup> Cartesian coordinates and frequencies for the two species can be found in Tables S1 and S2, respectively.

As Figure S27 shows, the electronic structure of the dinickel complex **2** is the same as for the mononickel complex **4**. The HOMO (138/139) is a linear combination of the metal-d and sulfur-p orbitals, and the LUMO (140/141) is the  $\pi^*$  orbital of iminopyridine, with the exception that you get linear combinations between both Ni/iminopyridine fragments unlike in complex **4**. We have plotted the in- and out-of-phase orbitals side-by-side in the MO plot to emphasize their near degeneracy, showing weak electronic coupling across the bridge between the Ni/iminopyridine fragments. We show only the lowest energy minimum structure here.

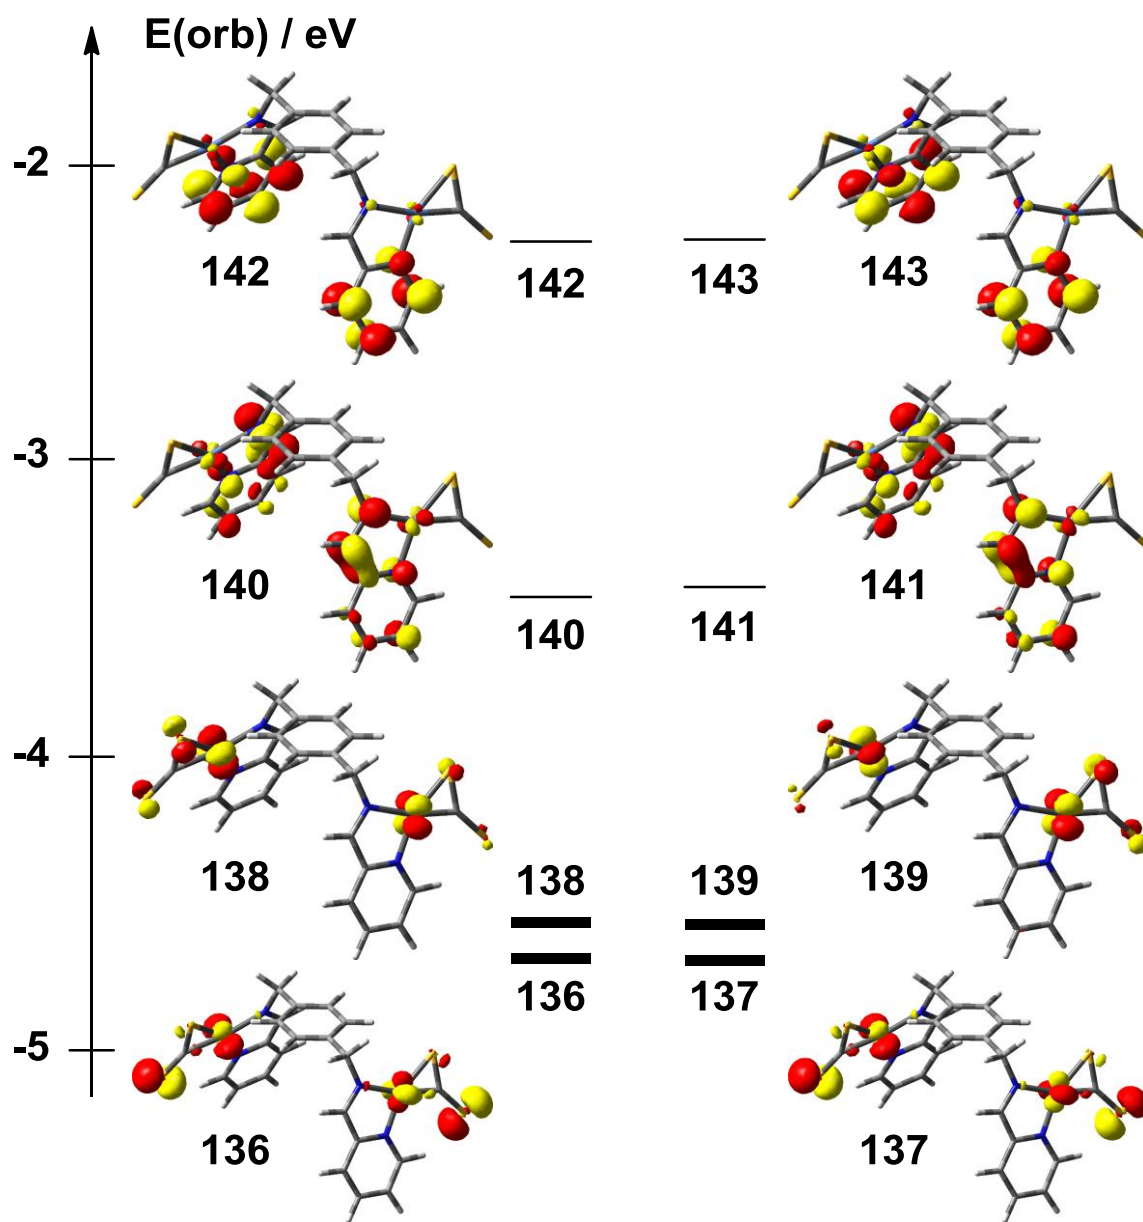

**Figure S28.** Frontier orbital diagram of **2**. Doubly occupied and unoccupied orbitals represented by bold and normal lines, respectively. All orbitals are plotted using an isosurface value of 0.05 both here and in Figure 4 of the main text.



**Table S1.** Cartesian coordinates (Å) for optimized structures of **2** and **4**.

|          |           |           |          |          |           |           |           |
|----------|-----------|-----------|----------|----------|-----------|-----------|-----------|
| <b>2</b> |           |           |          | H        | 0.798771  | 5.915465  | 3.577484  |
| C        | 2.079558  | -1.899228 | 1.010234 | Ni       | 4.881457  | -3.844789 | 5.914926  |
| C        | 3.214499  | -2.655487 | 1.336174 | Ni       | 0.826807  | 1.701920  | 0.672670  |
| C        | 3.235347  | -3.467749 | 2.486777 | C        | 1.638751  | 2.695877  | -0.647412 |
| C        | 2.095032  | -3.507184 | 3.312884 | C        | 4.322259  | -4.297991 | 7.609521  |
| C        | 0.962335  | -2.746111 | 2.990283 | S        | 3.370959  | -5.284952 | 6.593947  |
| C        | 0.940044  | -1.936938 | 1.837557 | S        | 1.410450  | 1.169785  | -1.374981 |
| H        | 2.080355  | -1.268459 | 0.113856 | S        | 4.625744  | -3.910022 | 9.167932  |
| H        | 4.091108  | -2.620885 | 0.677081 | S        | 2.223620  | 4.202272  | -0.892289 |
| H        | 2.098644  | -4.128496 | 4.215835 |          |           |           |           |
| H        | 0.079512  | -2.793943 | 3.640191 | <b>4</b> |           |           |           |
| C        | -0.292233 | -1.101596 | 1.511133 | C        | 1.024526  | 1.055386  | 0.601905  |
| H        | -1.161988 | -1.477628 | 2.085888 | H        | 1.645975  | 1.702785  | 1.240918  |
| H        | -0.531734 | -1.166453 | 0.435479 | N        | 1.326626  | -0.189212 | 0.384885  |
| C        | 4.483621  | -4.269169 | 2.836704 | Ni       | 0.014356  | -1.077850 | -0.827916 |
| H        | 4.212522  | -5.289597 | 3.158933 | C        | -0.596766 | -2.787342 | -1.531495 |
| H        | 5.139938  | -4.346622 | 1.947054 | S        | 0.945000  | -3.198985 | -1.275995 |
| N        | 5.213686  | -3.647102 | 3.959340 | S        | -2.145352 | -2.645395 | -1.894355 |
| N        | -0.058297 | 0.325224  | 1.810806 | C        | -0.185911 | 1.594616  | -0.022699 |
| C        | -0.470292 | 0.806095  | 2.949396 | C        | -2.006039 | 1.088763  | -1.405059 |
| H        | -1.017183 | 0.199336  | 3.689905 | C        | -0.619966 | 2.918670  | 0.134589  |
| C        | 6.221466  | -2.863510 | 3.699118 | C        | -2.497864 | 2.400847  | -1.294827 |
| H        | 6.575668  | -2.668514 | 2.673391 | H        | -2.525430 | 0.331605  | -2.000553 |
| C        | 6.879665  | -2.231245 | 4.836394 | C        | -1.797265 | 3.329078  | -0.513052 |
| C        | 7.972257  | -1.355166 | 4.733487 | H        | -0.042408 | 3.611896  | 0.754665  |
| N        | 6.327333  | -2.574026 | 6.050207 | H        | -3.418290 | 2.676394  | -1.817762 |
| C        | 8.518262  | -0.807677 | 5.903247 | H        | -2.158330 | 4.356718  | -0.406729 |
| H        | 8.379645  | -1.111555 | 3.746249 | N        | -0.876859 | 0.688365  | -0.785685 |
| C        | 6.860992  | -2.043203 | 7.172673 | C        | 3.518681  | -1.278439 | -0.045719 |
| C        | 7.950399  | -1.160100 | 7.138923 | C        | 4.050939  | -2.579086 | 0.069628  |
| H        | 9.369240  | -0.120861 | 5.850898 | C        | 3.932442  | -0.454893 | -1.113335 |
| H        | 6.383394  | -2.358777 | 8.111683 | C        | 4.985065  | -3.048939 | -0.867998 |
| H        | 8.343857  | -0.758511 | 8.078076 | H        | 3.744926  | -3.221362 | 0.904937  |
| C        | -0.172507 | 2.207042  | 3.223326 | C        | 4.860890  | -0.928018 | -2.053042 |
| C        | -0.535545 | 2.878929  | 4.401732 | H        | 3.533195  | 0.561956  | -1.212034 |
| N        | 0.510691  | 2.832241  | 2.204373 | C        | 5.387142  | -2.225761 | -1.933045 |
| C        | -0.189239 | 4.229657  | 4.549391 | H        | 5.399096  | -4.057592 | -0.764495 |
| H        | -1.079712 | 2.341183  | 5.185735 | H        | 5.176998  | -0.281404 | -2.878622 |
| C        | 0.838840  | 4.134682  | 2.354266 | H        | 6.112952  | -2.593009 | -2.666282 |
| C        | 0.508519  | 4.862424  | 3.507128 | C        | 2.536417  | -0.767908 | 0.997751  |
| H        | -0.458866 | 4.776421  | 5.458770 | H        | 2.203611  | -1.604933 | 1.638674  |
| H        | 1.376702  | 4.581794  | 1.505606 | H        | 3.007518  | -0.009736 | 1.656648  |

**Table S2.** Frequencies (cm<sup>-1</sup>) for optimized structures of **2** and **4**.

|           |           |           |           |           |           |
|-----------|-----------|-----------|-----------|-----------|-----------|
| <b>2</b>  |           |           | 1508.6621 | 1545.5157 | 1545.7144 |
| 5.1818    | 11.9155   | 12.4081   | 1580.2787 | 1594.2350 | 1594.2864 |
| 25.9637   | 26.6556   | 36.9066   | 1600.4680 | 1601.0226 | 1612.8951 |
| 45.3892   | 54.8766   | 59.2170   | 2959.8434 | 2959.9573 | 3033.5090 |
| 60.0255   | 77.6280   | 92.7126   | 3033.5600 | 3048.4385 | 3048.4656 |
| 98.3389   | 111.7321  | 127.2855  | 3065.0456 | 3065.0844 | 3100.6275 |
| 127.7716  | 155.2031  | 174.7145  | 3101.8771 | 3122.4694 | 3124.0297 |
| 174.8754  | 188.4181  | 191.6533  | 3126.1146 | 3126.1272 | 3137.6811 |
| 228.4361  | 242.1085  | 269.8143  | 3137.6956 | 3149.1066 | 3149.1210 |
| 277.7304  | 293.6624  | 307.6754  |           |           |           |
| 308.9239  | 312.1262  | 330.1953  | <b>4</b>  |           |           |
| 348.8200  | 355.5316  | 363.9434  | 15.2757   | 21.0504   | 40.2939   |
| 367.1051  | 400.3866  | 403.7404  | 43.3892   | 45.8215   | 75.8520   |
| 411.3661  | 421.5640  | 423.3688  | 77.1653   | 96.5592   | 138.3203  |
| 427.9403  | 455.2550  | 457.9297  | 145.4224  | 179.8550  | 231.0544  |
| 473.9424  | 492.0548  | 492.4085  | 250.4157  | 274.6245  | 279.5487  |
| 504.7788  | 514.2114  | 520.9041  | 314.9956  | 324.7940  | 346.2419  |
| 610.5333  | 634.1567  | 637.3380  | 399.0958  | 410.5144  | 422.7691  |
| 638.3144  | 643.7527  | 643.7745  | 455.8114  | 461.5932  | 492.7254  |
| 655.8236  | 662.5277  | 702.9926  | 502.5132  | 599.3664  | 603.9221  |
| 722.1339  | 724.2204  | 744.1798  | 610.7956  | 641.1460  | 659.6500  |
| 747.9226  | 781.1334  | 804.4322  | 686.4616  | 728.1388  | 734.0283  |
| 818.2315  | 835.6307  | 865.3261  | 753.9188  | 804.1315  | 822.1314  |
| 867.0452  | 867.1428  | 868.7022  | 866.8881  | 878.9081  | 891.5846  |
| 898.2135  | 900.7688  | 925.1553  | 924.0423  | 934.3646  | 946.4630  |
| 927.2631  | 944.2042  | 944.2514  | 951.1761  | 971.4029  | 985.2413  |
| 958.4405  | 974.6004  | 975.2494  | 985.3932  | 1006.5128 | 1027.8364 |
| 975.3583  | 1000.3720 | 1001.1900 | 1037.2416 | 1048.8183 | 1087.1316 |
| 1007.7484 | 1019.2987 | 1024.5848 | 1108.5099 | 1162.4339 | 1164.7494 |
| 1044.7606 | 1044.7737 | 1104.4263 | 1178.8592 | 1189.5865 | 1210.2229 |
| 1104.8343 | 1121.2447 | 1152.7525 | 1230.0613 | 1290.6947 | 1298.8190 |
| 1152.7916 | 1182.2697 | 1188.9984 | 1320.7336 | 1332.5066 | 1358.5873 |
| 1192.1443 | 1193.0355 | 1193.9841 | 1364.2839 | 1394.0642 | 1439.0335 |
| 1199.2168 | 1199.3883 | 1227.1934 | 1445.5641 | 1453.3364 | 1470.1977 |
| 1227.5679 | 1296.4968 | 1296.5291 | 1493.9002 | 1563.7055 | 1588.2678 |
| 1310.5919 | 1314.5011 | 1315.1572 | 1594.5076 | 1602.8769 | 1618.0949 |
| 1319.6482 | 1326.7039 | 1352.8617 | 2951.1361 | 3019.4322 | 3068.1530 |
| 1359.4416 | 1364.3430 | 1418.2498 | 3105.5199 | 3106.2340 | 3128.8249 |
| 1436.9158 | 1437.1119 | 1465.3038 | 3136.7713 | 3142.0041 | 3146.2068 |
| 1465.3784 | 1467.7285 | 1468.5605 | 3147.3439 | 3155.0263 | 3165.0196 |

## 9. Electrochemistry

The electrochemical properties were determined by CV on a BAS Epsilon system. Samples were prepared in anhydrous *N,N'*-Dimethylformamide with tetrabutylammonium hexafluorophosphate (0.1 M) as the supporting electrolyte. The redox potentials were found versus an Ag/Ag<sup>+</sup> reference electrode. The Fc/Fc<sup>+</sup> potential was determined vs. the Ag/Ag<sup>+</sup> electrode using average based on 10 observations.

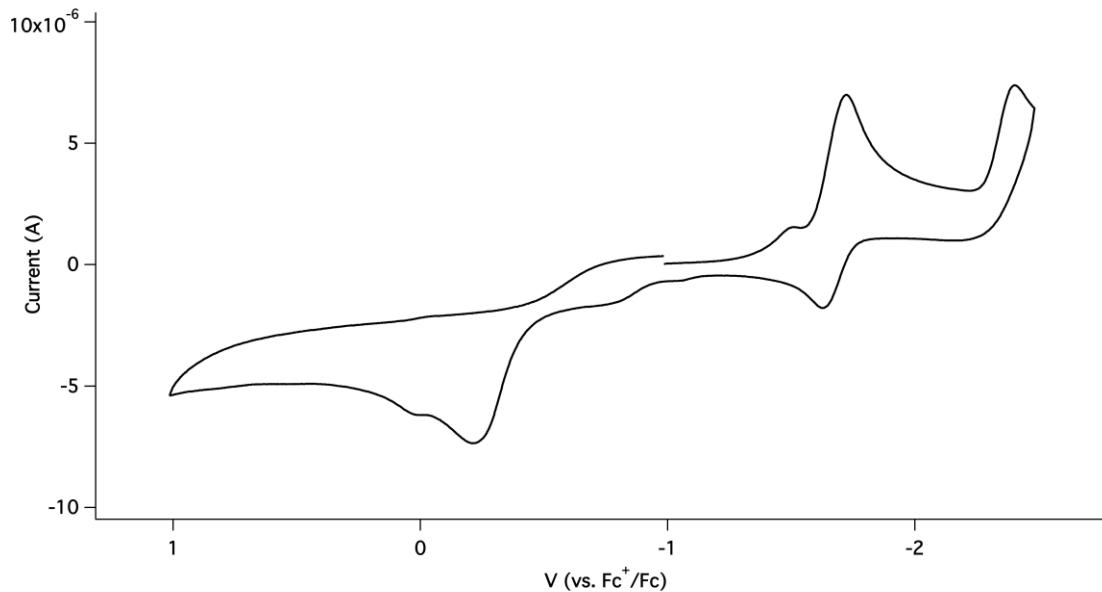

**Figure S29.** Cyclic voltammogram of Ni<sub>2</sub>Lig<sup>1</sup>(CS<sub>2</sub>)<sub>2</sub> (0.1 M [N(*n*-Bu)<sub>4</sub>](PF<sub>6</sub>) in DMF, 25 °C, Platinum working electrode, 100 mV/s scan rate).

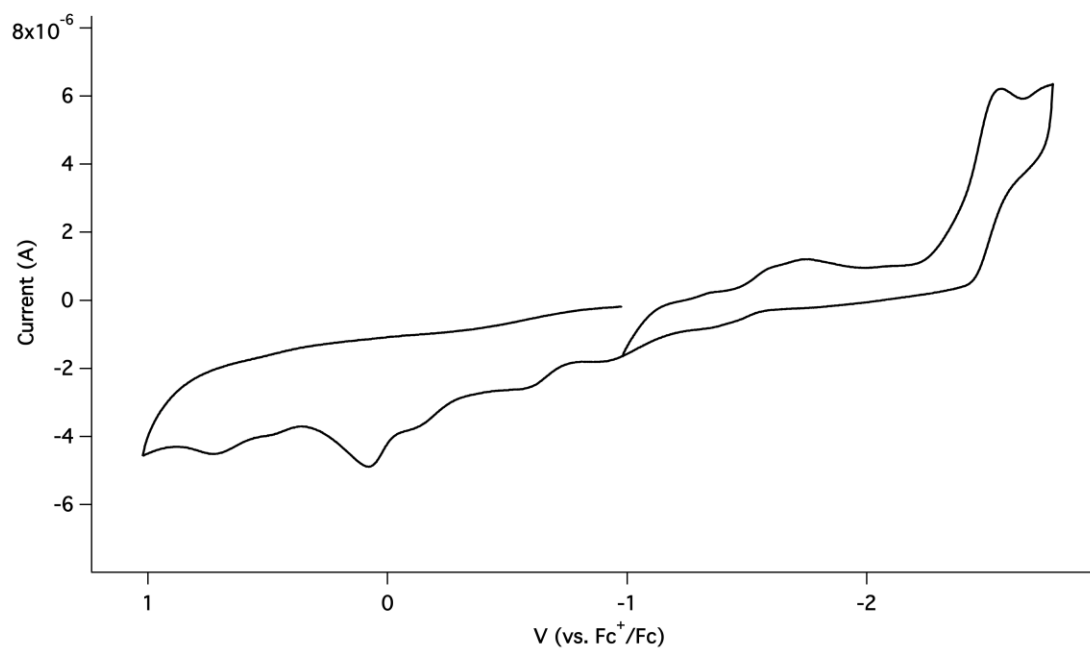

**Figure S30.** Cyclic voltammogram of  $\text{Ni}_2\text{Lig}^1(\text{COD})_2$  (0.1 M  $[\text{N}(n\text{-Bu})_4](\text{PF}_6)$  in DMF, 25  $^\circ\text{C}$ , Platinum working electrode, 100 mV/s scan rate).

## 10. References

- <sup>1</sup>. Bheemaraju, A.; Lord, R.L.; Müller, P.; Groysman, S. *Organometallics* **2012**, *31*, 2120.
- <sup>2</sup>. Volpe, E. C.; Wolczanski, P. T.; and Lobkovski, E. B. *Organometallics*, **2010**, *29*, 364.
- <sup>3</sup>. Parr, R. G.; Yang, W. *Density-functional theory of atoms and molecules*; Oxford University Press: New York, 1989.
- <sup>4</sup>. Frisch, M. J.; Trucks, G. W.; Schlegel, H. B.; Scuseria, G. E.; Robb, M. A.; Cheeseman, J. R.; Scalmani, G.; Barone, V.; Mennucci, B.; Nakatsuji, G. A. P. H.; Caricato, M.; Li, X.; Hratchian, H. P.; Izmaylov, A. F.; Bloino, J.; Zheng, G.; Sonnenberg, J. L.; Hada, M.; Ehara, M.; Toyota, K.; Fukuda, R.; Hasegawa, J.; Ishida, M.; Nakajima, T.; Honda, Y.; Kitao, O.; Nakai, H.; Vreven, T.; J. A. Montgomery, J.; Peralta, J. E.; Ogliaro, F.; Bearpark, M.; Heyd, J. J.; Brothers, E.; Kudin, K. N.; Staroverov, V. N.; Keith, T.; Kobayashi, R.; Normand, J.; Raghavachari, K.; Rendell, A.; Burant, J. C.; Iyengar, S. S.; Tomasi, J.; Cossi, M.; Rega, N.; Millam, J. M.; Klene, M.; Knox, J. E.; Cross, J. B.; Bakken, V.; Adamo, C.; Jaramillo, J.; Gomperts, R.; Stratmann, R. E.; Yazyev, O.; Austin, A. J.; Cammi, R.; Pomelli, C.; Ochterski, J. W.; Martin, R. L.; Morokuma, K.; Zakrzewski, V. G.; Voth, G. A.; Salvador, P.; Dannenberg, J. J.; Dapprich, S.; Parandekar, P. V.; Mayhall, N. J.; Daniels, A. D.; Farkas, O.; Foresman, J. B.; Ortiz, J. V.; Cioslowski, J.; Fox, D. J. *Gaussian 09, Revision C.01* Wallingford CT, 2010.
- <sup>5</sup>. Becke, A. D. *Phys. Rev. A* **1988**, *38*, 3761.
- <sup>6</sup>. Perdew, J.P. *Phys. Rev. B* **1986**, *33*, 8822.
- <sup>7</sup>. Hay, P.J.; Wadt, W.R. *J. Chem. Phys.* **1985**, *82*, 270.
- <sup>8</sup>. Wadt, W.R.; Hay, P.J. *J. Chem. Phys.* **1985**, *82*, 284.
- <sup>9</sup>. Hay, P.J.; Wadt, W.R. *J. Chem. Phys.* **1985**, *82*, 299.
- <sup>10</sup>. Dunlap, B.I. *J. Mol. Struct. (Theochem)* **2000**, *529*, 37.
- <sup>11</sup>. Schlegel, H. B.; McDouall, J. J. In *Computational Advances in Organic Chemistry*; Ögretir, C., Csizmadia, I. G., Eds.; Kluwer Academic: Amsterdam, The Netherlands, 1991.
- <sup>12</sup>. Bauernschmitt, R.; Ahlrichs, R. *J. Chem. Phys.* **1996**, *104*, 9047.
- <sup>13</sup>. Schlegel, H. B. *J. Comput. Chem.* **1982**, *3*, 214.
